# Supplementary material for: A user's guide to the thiol-thioester exchange in organic media: scope, limitations, and applications in material science
Source: Royal Society of Chemistry journal article supplement (doi:10.1039/c8py01031e), 2018-01-01
Supplement: c8py01031e1.pdf [file c8py01031e1.pdf]

## Supplementary Information

### A User's Guide to the Thiol-Thioester Exchange in Organic Media: Scope, Limitation, and Applications in Material Science

Brady T. Worrell,<sup>a</sup> Sudheendran Mavila,<sup>a</sup> Chen Wang,<sup>a</sup> Chern Hooi-Lim,<sup>a</sup> Matthew K. McBride,<sup>a</sup> Charles B. Musgrave,<sup>a</sup> Richard Shoemaker,<sup>a</sup> Christopher N. Bowman\*<sup>a</sup>

<sup>a</sup>*Department of Chemical and Biological Engineering, University of Colorado – Boulder, Boulder, Colorado, 80309*

e-mail: christopher.bowman@colorado.edu

#### Table of Contents

|                                                                                                                                            |     |
|--------------------------------------------------------------------------------------------------------------------------------------------|-----|
| 1. General Information                                                                                                                     | S2  |
| 2. General Experimental Procedures                                                                                                         | S3  |
| a. General procedure for the preparation of calibration curves of various thioesters                                                       | S3  |
| b. General procedures for determining the extent of exchange between various thioesters, thiols, and bases/nucleophiles in organic solvent | S5  |
| c. General procedure to determine the requirement for free thiol in the nucleophile catalyzed thiol-thioester exchange                     | S7  |
| 3. Additional Figures                                                                                                                      | S8  |
| 4. Relevant Spectra                                                                                                                        | S9  |
| 5. Calibration Curves                                                                                                                      | S15 |
| 6. Raw and Processed Exchange Data                                                                                                         | S31 |

## 1. General Information

All reactions were carried out under an argon atmosphere with dry solvents using anhydrous conditions unless otherwise stated.  $^1\text{H}$  NMR (400 MHz) and  $^{13}\text{C}$  NMR (101 MHz) were recorded in  $\text{C}_6\text{D}_6$  (internal standard: 7.15 ppm,  $^1\text{H}$ ; 128.26 ppm,  $^{13}\text{C}$ ), in  $\text{THF-d}_8$  (internal standard: 3.58 ppm,  $^1\text{H}$ ; 67.57 ppm,  $^{13}\text{C}$ ), in  $\text{CDCl}_3$  (internal standard: 7.26 ppm,  $^1\text{H}$ ; 77.00 ppm,  $^{13}\text{C}$ ), in  $\text{MeCN-d}_3$  (internal standard: 1.94 ppm,  $^1\text{H}$ ; 118.3 ppm,  $^{13}\text{C}$ ), in  $\text{DMSO-d}_6$  (internal standard: 2.50 ppm,  $^1\text{H}$ ; 39.52 ppm,  $^{13}\text{C}$ ), in  $\text{MeOD-d}_3$  (internal standard: 3.31 ppm,  $^1\text{H}$ ; 49.15 ppm,  $^{13}\text{C}$ ), on a Bruker DRX-400MHz spectrometer. Chemical shifts ( $\delta$ ) were reported as parts per million (ppm) and the following abbreviations were used to identify the multiplicities: s = singlet, d = doublet, t = triplet, q = quartet, sept. = septet, m = multiplet, b = broad and all combinations thereof can be explained by their integral parts. Column chromatography was carried out employing EMD (Merck) Geduran Silica Gel 60 (40-63  $\mu\text{m}$ ) with the indicated solvent mixtures. Infrared spectra were recorded using a Perkin Elmer Spectrum 100-FTIR spectrometer. Melting points were determined using a Thomas-Hoover capillary melting apparatus and are uncorrected. The following chemicals: 2-mercaptopyridine (99%), thiophenol (97%), s-phenyl thioacetate (98%), 1-octanethiol (98.5%), methyl 3-mercaptopropionate (98%), cysteamine (~95%), acetyl chloride (98%), pyridine (anhydrous, 98.8%), 1-heptanol (98%), diethylene glycol methyl ether (>99%), and 2-tert-butylimino-2-diethylamino-1,3-dimethylperhydro-1,3,2-diazaphosphorine (>98%) were purchased from Sigma-Aldrich and used as received. The following chemicals: di-tert-butyl dicarbonate, triethylamine, 1,8-diazabicyclo[5.4.0]undec-7-ene were purchased from Chem-Impex and used as received. 2-(boc-amino)ethanethiol was prepared using published procedures.<sup>13</sup> All deuterated solvents utilized in this study ( $\text{C}_6\text{D}_6$ ,  $\text{THF-d}_8$ ,  $\text{CDCl}_3$ ,  $\text{MeCN-d}_3$ ,  $\text{DMSO-d}_6$ , and  $\text{MeOD-d}_3$ ) were obtained from Cambridge Isotope Laboratories, Inc. and were used as received.

## 2. General Experimental Procedures

### a. General procedures for the preparation of calibration curves of various thioesters

The preparation of various stock solutions required (utilizing thioester **1a** as a representative compound):

- i)* Thioester stock solution (**SS-CC1**): To a 1-dram screw top vial was added 54.7 mgs (48.7  $\mu\text{L}$ , 0.36 mmol) of *s*-phenyl thioacetate and this was diluted with 1.20 mL (0.30 M) of a deuterated solvent (either  $\text{C}_6\text{D}_6$ , THF- $\text{d}_8$ ,  $\text{CDCl}_3$ , MeCN- $\text{d}_3$ , DMSO- $\text{d}_6$ , or MeOD- $\text{d}_3$ ), capped, and vortexed until fully homogeneous. These stock solutions were used directly after mixing and made fresh if required after 24 hours. This stock solution was prepared with enough material for 4 samples with the excess (~200  $\mu\text{L}$ ) being discarded.
- ii)* Internal standard (IS) stock solution (**SS-CC2**): To a 1-dram screw top vial was added 20.2 mgs (0.12 mmol) of 1,3,5-trimethoxybenzene and diluted with 1.00 mL (0.12 M) of a deuterated solvent (either  $\text{C}_6\text{D}_6$ , THF- $\text{d}_8$ ,  $\text{CDCl}_3$ , MeCN- $\text{d}_3$ , DMSO- $\text{d}_6$ , or MeOD- $\text{d}_3$ ), capped, and vortexed until fully homogeneous. These stock solutions were used directly after mixing and made fresh if required after 24 hours. This stock solution was prepared with enough material for 4 samples with the excess (~200  $\mu\text{L}$ ) being discarded.

To a standard NMR tube, utilizing a calibrated autopipette, the designated amount (see table provided below, **Table S1**) of the thioester stock solution (**SS-CC1**) was added, followed by 200  $\mu\text{L}$  of the internal standard stock solution (**SS-CC2**), and finally was diluted with a designated amount (see table provided below, **Table S1**) of the deuterated solvent (pipette tips were discarded and changed between each addition). This NMR tube was capped and vortexed until fully homogeneous;  $^1\text{H-NMR}$  of this series was immediately acquisitioned.

| sample # | thioester<br>( <b>SS-CC1</b> ) | IS<br>( <b>SS-CC2</b> ) | solvent           | total             |
|----------|--------------------------------|-------------------------|-------------------|-------------------|
| 1 (100%) | 400 $\mu\text{L}$              | 200 $\mu\text{L}$       | 0 $\mu\text{L}$   | 600 $\mu\text{L}$ |
| 2 (75%)  | 300 $\mu\text{L}$              | 200 $\mu\text{L}$       | 100 $\mu\text{L}$ | 600 $\mu\text{L}$ |
| 3 (50%)  | 200 $\mu\text{L}$              | 200 $\mu\text{L}$       | 200 $\mu\text{L}$ | 600 $\mu\text{L}$ |
| 4 (25%)  | 100 $\mu\text{L}$              | 200 $\mu\text{L}$       | 300 $\mu\text{L}$ | 600 $\mu\text{L}$ |

**Table S1:** Amounts of stock solutions and solvent used to prepare samples which corresponds to 100%, 75%, 50%, and 25% yield of a given thioester in comparison to a constant concentration of the internal standard.

The calibration curves provided in the accompany portion of this Supplemental Information (separate document – Microsoft Excel, titled: Supplementary Information, Part 2) were formed by integrating the aromatic peak of the internal standard (see **Table S2** for chemical shifts in each solvent), normalizing to 1.00, then integrating the acyl peak of the thioester (see **Table S3** for chemical shifts in each solvent), and recording the resultant value for the thioester integral. This procedure was also performed for the aliphatic peak ( $-\text{OCH}_3$ ) of the internal standard (see **Table S2** for chemical shifts in each solvent) and compared to the thioester integral. The two separate ratios (acyl thioester integral/internal standard integral) obtained from this operation were plotted against the respective ideal

yield they represent (25%, 50%, 75%, and 100%) and fitted to a linear function. This operation was performed for each thioester in each solvent (5 thioesters x 6 solvents = 30 total calibration curves). Equations obtained from this procedure were used to calibrate experimental values obtained from the subsequent exchange experiments.

| deuterated solvent            | aromatic peak of IS<br>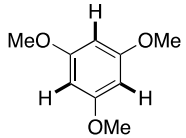 | aliphatic peak of IS<br> |
|-------------------------------|----------------------------------------------------------------------------------------------------------|-------------------------------------------------------------------------------------------------------------|
| C <sub>6</sub> D <sub>6</sub> | 6.24                                                                                                     | 3.32                                                                                                        |
| THF-d <sub>8</sub>            | 6.05                                                                                                     | 3.70                                                                                                        |
| CDCl <sub>3</sub>             | 6.08                                                                                                     | 3.76                                                                                                        |
| MeCN-d <sub>3</sub>           | 6.10                                                                                                     | 3.74                                                                                                        |
| DMSO-d <sub>6</sub>           | 6.09                                                                                                     | 3.70                                                                                                        |
| MeOD-d <sub>3</sub>           | 6.07                                                                                                     | 3.73                                                                                                        |

**Table S2:** Location of the aromatic and aliphatic peaks of the internal standard, 1,3,5-trimethoxybenzene in the deuterated solvents utilized in this study (values given in ppm).

| deuterated solvent            | thioester 1a<br>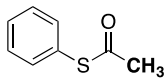 | thioester 1b<br> | thioester 1c<br> | thioester 1d<br> | thioester 1e<br> |
|-------------------------------|-----------------------------------------------------------------------------------------------------|-----------------------------------------------------------------------------------------------------|-----------------------------------------------------------------------------------------------------|------------------------------------------------------------------------------------------------------|-------------------------------------------------------------------------------------------------------|
| C <sub>6</sub> D <sub>6</sub> | 1.84                                                                                                | 1.80                                                                                                | 1.90                                                                                                | 1.90                                                                                                 | 1.78                                                                                                  |
| THF-d <sub>8</sub>            | 2.36                                                                                                | 2.40                                                                                                | 2.26                                                                                                | 2.27                                                                                                 | 2.27                                                                                                  |
| CDCl <sub>3</sub>             | 2.42                                                                                                | 2.46                                                                                                | 2.31                                                                                                | 2.31                                                                                                 | 2.34                                                                                                  |
| MeCN-d <sub>3</sub>           | 2.39                                                                                                | 2.43                                                                                                | 2.28                                                                                                | 2.29                                                                                                 | 2.30                                                                                                  |
| DMSO-d <sub>6</sub>           | 2.43                                                                                                | 2.46                                                                                                | 2.31                                                                                                | 2.32                                                                                                 | 2.32                                                                                                  |
| MeOD-d <sub>3</sub>           | 2.39                                                                                                | 2.30                                                                                                | 2.31                                                                                                | 2.31                                                                                                 | 2.31                                                                                                  |

**Table S3:** Location of the aromatic and aliphatic peaks of the internal standard, 1,3,5-trimethoxybenzene in the deuterated solvents utilized in this study (values given in ppm).

**b. General procedure for determining the extent of exchange between various thioesters, thiols, and bases/nucleophiles in organic solvent**

The preparation of various stock solutions required (utilizing thioester **1a** as the representative thioester and thiol **2c** as the representative thiol):

- i)* Thioester stock solution (**SS-EX1**): To a 1-dram vial was added 152 mgs (135  $\mu$ L, 1.00 mmol) of *s*-phenyl thioacetate and diluted with 750  $\mu$ L (1.33 M) of a deuterated solvent (either  $C_6D_6$ , THF- $d_8$ ,  $CDCl_3$ , MeCN- $d_3$ , DMSO- $d_6$ , or MeOD- $d_3$ ), capped, and vortexed until fully homogeneous. These stock solutions were used directly after mixing and made fresh if required after 24 hours. This stock solution was prepared with enough material for 4 samples with the excess being discarded.
- ii)* Thiol stock solution (**SS-EX2**): To a 1-dram vial was added 146 mgs (174  $\mu$ L, 1.00 mmol) of 1-octanethiol and diluted with 750  $\mu$ L (1.33 M) of a deuterated solvent (either  $C_6D_6$ , THF- $d_8$ ,  $CDCl_3$ , MeCN- $d_3$ , DMSO- $d_6$ , or MeOD- $d_3$ ), capped, and vortexed until fully homogeneous. These stock solutions were used directly after mixing and made fresh if required after 24 hours. This stock solution was prepared with enough material for 4 samples with the excess being discarded.
- iii)* Triethylamine stock solution (**SS-EX3**): To a 20 mL scintillation vial was added 61.3  $\mu$ L (44.5 mgs, 0.44 mmol) of triethylamine and diluted with 3.30 mLs (0.13 M) of a deuterated solvent (either  $C_6D_6$ , THF- $d_8$ ,  $CDCl_3$ , MeCN- $d_3$ , DMSO- $d_6$ , or MeOD- $d_3$ ), capped, and vortexed until fully homogeneous. These stock solutions were used directly after mixing and made fresh if required after 24 hours. This stock solution was prepared with enough material for 20 samples with the excess being discarded.
- iv)* Internal standard stock solution (**SS-EX4**): To a 20 mL scintillation vial was added 148 mgs (0.88 mmol) of 1,3,5-trimethoxybenzene and diluted with 3.30 mLs (0.27 M) of a deuterated solvent (either  $C_6D_6$ , THF- $d_8$ ,  $CDCl_3$ , MeCN- $d_3$ , DMSO- $d_6$ , or MeOD- $d_3$ ), capped, and vortexed until fully homogeneous. These stock solutions were used directly after mixing and made fresh if required after 24 hours. This stock solution was prepared with enough material for 20 samples with the excess being discarded.

To a standard NMR tube, utilizing a calibrated autopipette, 150  $\mu$ L of the thioester stock solution (**SS-EX1**) was added, followed by 150  $\mu$ L of the thiol stock solution (**SS-EX2**), followed by 150  $\mu$ L of the internal standard stock solution (**SS-EX3**), and finally 150  $\mu$ L of the triethylamine stock solution (**SS-EX4**) to initiate the exchange reaction (pipette tips were discarded and changed between each addition). This NMR tube was capped and vortexed until fully homogeneous;  $^1H$ -NMR of this series was acquisitioned after 12 hours using a timed autosampler.

| sample # | thioester<br>(SS-EX1) | thiol<br>(SS-EX2) | IS<br>(SS-EX3) | triethylamine<br>(SS-EX4) | total       |
|----------|-----------------------|-------------------|----------------|---------------------------|-------------|
| 1        | 150 $\mu$ L           | 150 $\mu$ L       | 150 $\mu$ L    | 150 $\mu$ L               | 600 $\mu$ L |

**Table S4:** Amounts of the various stock solutions added to prepare a standard exchange experiment.

The exchange values provided in the manuscript were calculated by integrating the aromatic peak of the internal standard (see **Table S2** for the chemical shifts in each solvent), normalizing to 1.00, then integrating the acyl peak of both the acyl thioester (if applicable) and the exchanged acyl peak of the exchanged thioester (if applicable; see **Table S3** for the chemical shifts of each of the thioester acyl peak locations), and recording the resultant value for the thioester integral(s). This procedure was also performed for the aliphatic peak (-OCH<sub>3</sub>) of the internal standard (see **Table S2** for the chemical shifts in each solvent) and compared to the thioester integral. The two ratios (acyl thioester integral/aromatic SI and acyl thioester integral/aliphatic SI) obtained from each of these treatments were placed into the equations obtained from each calibration curve ([yield] = slope\*[experimental ratio]+y) to account for error and to give an experimental exchange yield. These two experimental values were then averaged and used directly to identify the extent of exchange or lack thereof.

**Note:** When other formulations were employed, such as other bases (those found in **Table 1** – pyridine, DBU, or BEMP) or nucleophiles (those found in **Table 3** – DMAP, DABCO, or quinuclidine), a similar procedure as above was employed. In these cases, the stock solution **SS-EX4** was mixed using only small quantities of the base (0.08 mmol, enough for 3 samples) to minimize the amount of the somewhat costly deuterated solvents utilized. In the case of experiments where the effect of temperature was explored, the same procedure as above was utilized to prepare the samples. The NMR vials were directly placed into an equilibrated oil bath and allowed to sit undisturbed for the requisite time. Samples that were kept at the designated temperature (25°C, 50°C, and 75°C) for only 5 minutes were quenched with 2 drops of TFA and vortexed to ensure the complete quenching of the exchange; the NMR was acquisitioned after this quenching procedure. Those kept at the designated temperature for 12 hours were not quenched with TFA and the NMRs were acquisitioned directly following this period.

**c. General procedure to determine the requirement for free thiol in the nucleophile catalyzed thiol-thioester exchange**

+ **free thiol + thioester + nucleophile** formulation: To a 10.0 mL speed mixer vial was added 250 mgs (0.87 mmol, 1.00 equiv) of **TEDAE**, 427 mgs (0.87 mmol, 1.00 equiv, “100% excess thiol”) of pentaerythritol tetra(3-mercaptopropionate) (**PETMP**), and 4.83 mgs (0.04 mmol, 0.05 equiv, 5.00 mol%). This clear resin was then manually mixed with a pipette tip for ~2 minutes to make a homogenous mixture. Following this, approximately 8.91 mgs ( $3.48 \times 10^{-2}$  mmol, 0.04 equiv, 4.00 mol%) of 2,2-dimethoxy-2-phenylacetophenone (**DMPA**), which had been crushed with the flat side of a spatula to form a fine powder, was added and the resin was further manually mixed with a pipette tip for an additional ~2 minutes to form a homogeneous mixture. At this time the clear resin was poured between two glass slides treated with Rain-X (ITW Global Brands, Houston, TX) using 250  $\mu\text{m}$  thick spacers (Small Parts Inc., Logansport, IN). The material was irradiated (365 nm, 5.00  $\mu\text{W}/\text{cm}^2$ , room temperature) for ~10 minutes to yield the thioester-containing crosslinked network polymer. The conversion was found to be essentially quantitative by FT-IR, revealing complete consumption of the “ene” species. These fully-formed polymers were used directly for all subsequent studies.

–**free SH + thioester + nucleophile** formulation: The representative procedure outlined above was modified to a 2:1 ene:thiol ratio (as opposed to 1:2 ene:thiol) to ensure that all free thiol was consumed and a similar crosslinking density was preserved (**Fig. 9**, green line)

+ **free SH – thioester + nucleophile** formulation: The representative procedure outlined above was utilized, however, **DAEC** (**DiAllylEster Control**, see below for structure), which contained no thioester linkage, was employed in the stead of **TEDAE**; relative stoichiometry of ene:thiol (1:2) was maintained (**Fig. 9**, red line).

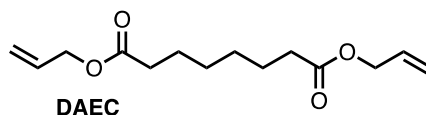

+ **free SH + thioester – nucleophile** formulation: The representative procedure outlined above was utilized, however, quinuclidine was not added to the resin (**Fig. 9**, blue line).

### 3. Additional Figures

Below is a time course <sup>1</sup>H-NMR of the exchange between thioester **1a** (0.20 mmol, 1.00 equiv), thiol **2c** (0.20 mmol, 1.00 equiv), catalyzed by triethylamine (0.02 mmol, 10.0 mol%) in DMSO-d<sub>6</sub> (0.20 M) at room temperature over the course of 12 hours. As can be noted, the reaction has fully equilibrated by 5000 seconds (~1.4 hours). The slight dip in the relative ratios is likely due to the slow hydrolysis of the thioester products under these basic conditions.

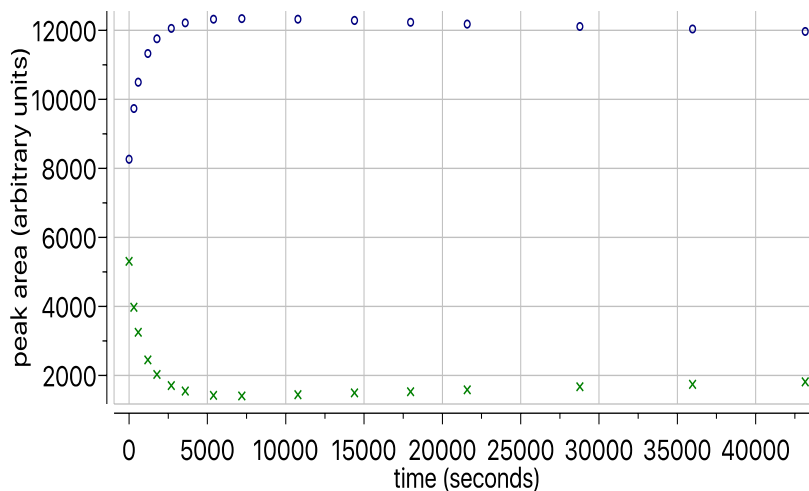

**Figure S1:** Time course of the exchange of thioester **1a** (1.00 equiv) with thiol **2c** (1.00 equiv) as catalyzed by TEA (10.0 mol%) in DMSO-d<sub>6</sub> (0.20 M) at room temperature.

*Legend:* blue circles (acyl peak of the thioester corresponding to thioester **1c**), green crosses (acyl peak of the thioester corresponding to thioester **1a**).

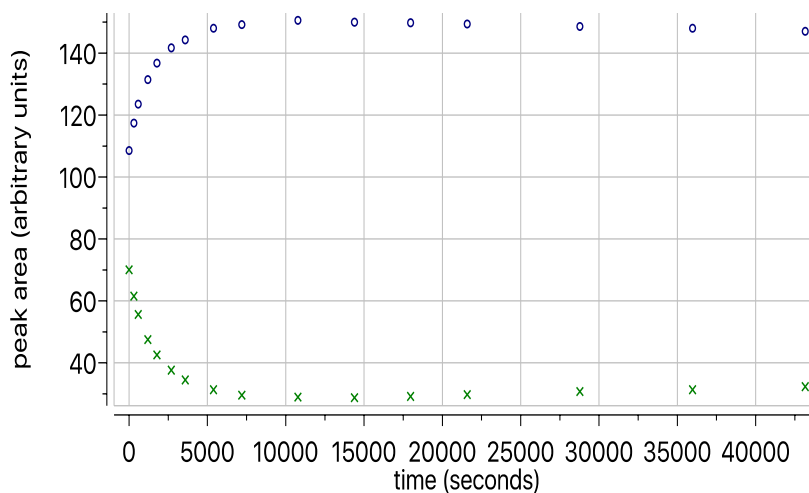

**Figure S2:** Time course of the exchange of thioester **1a** (1.00 equiv) with thiol **2c** (1.00 equiv) as catalyzed by TEA (5.00 mol%) in DMSO-d<sub>6</sub> (0.20 M) at room temperature. With less of the basic catalyst the exchange had slightly slower kinetics, however, a similar trend was observed as above.

*Legend:* blue circles (acyl peak of the thioester corresponding to thioester **1c**), green crosses (acyl peak of the thioester corresponding to thioester **1a**).



## 4. Relevant Spectra

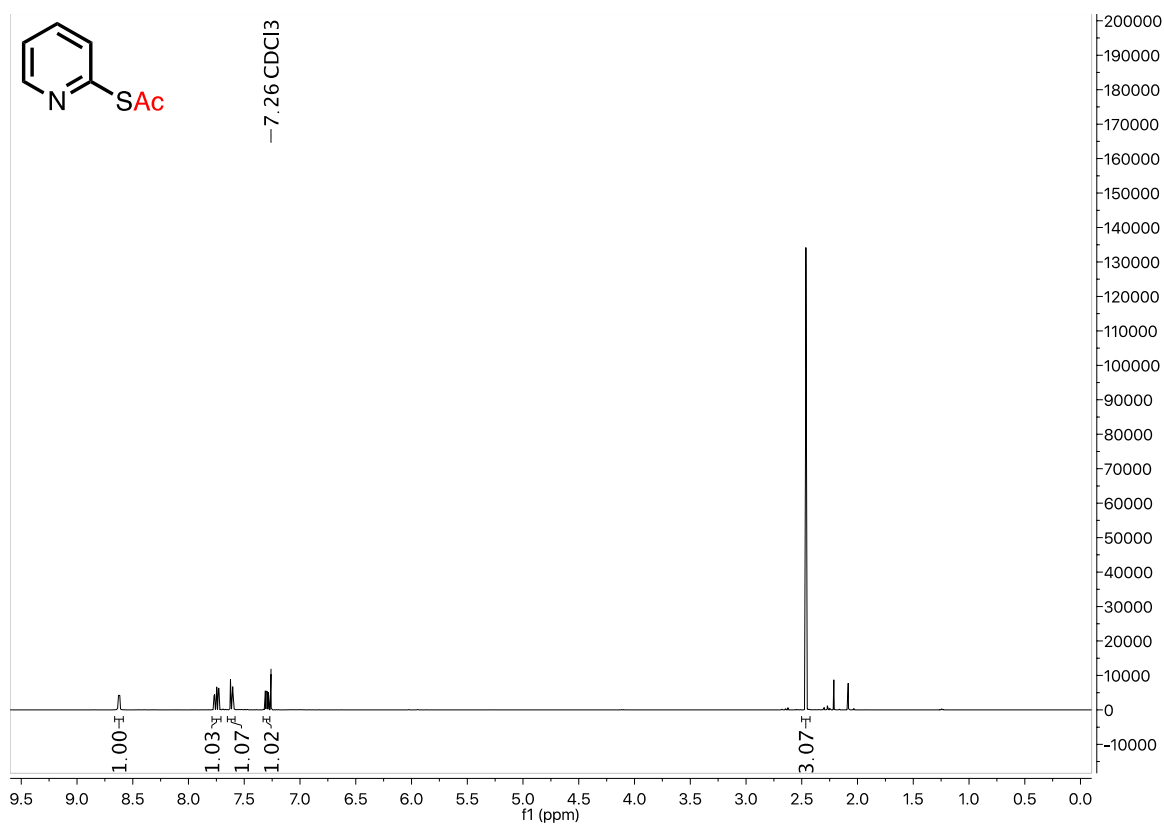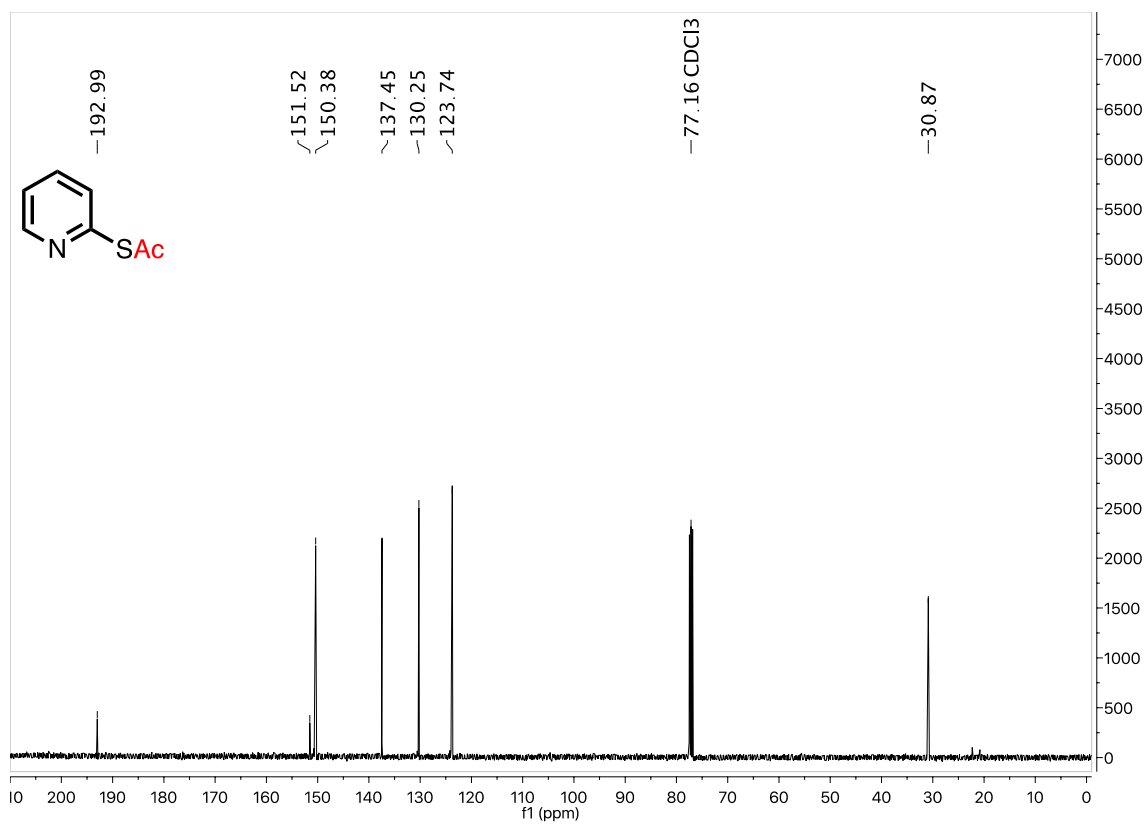

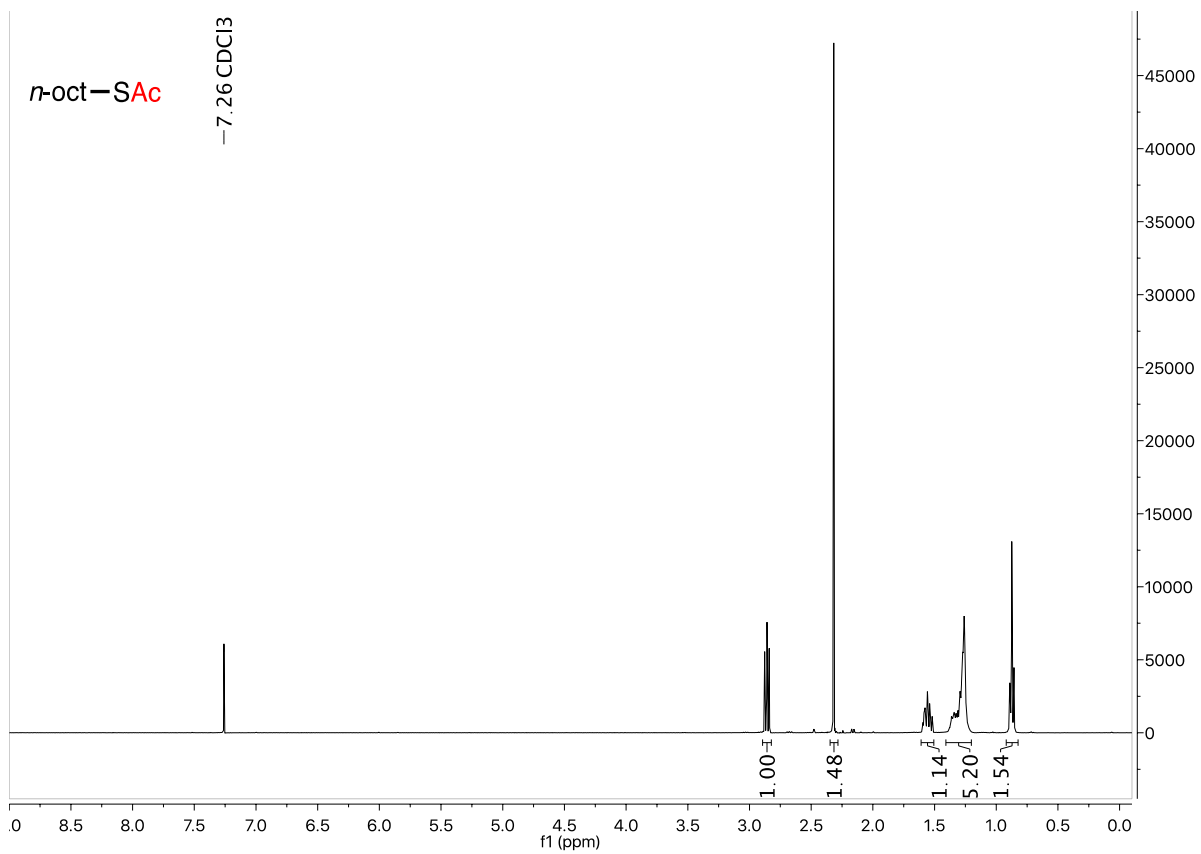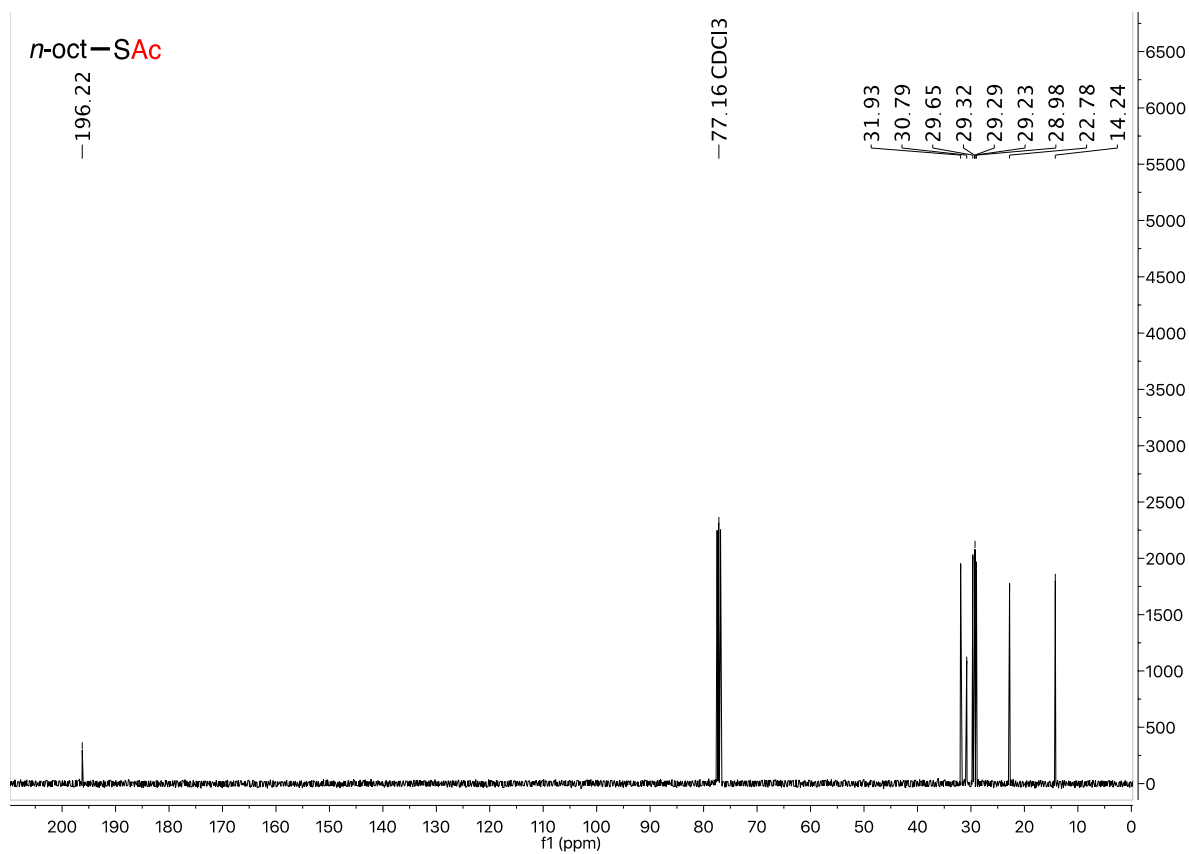

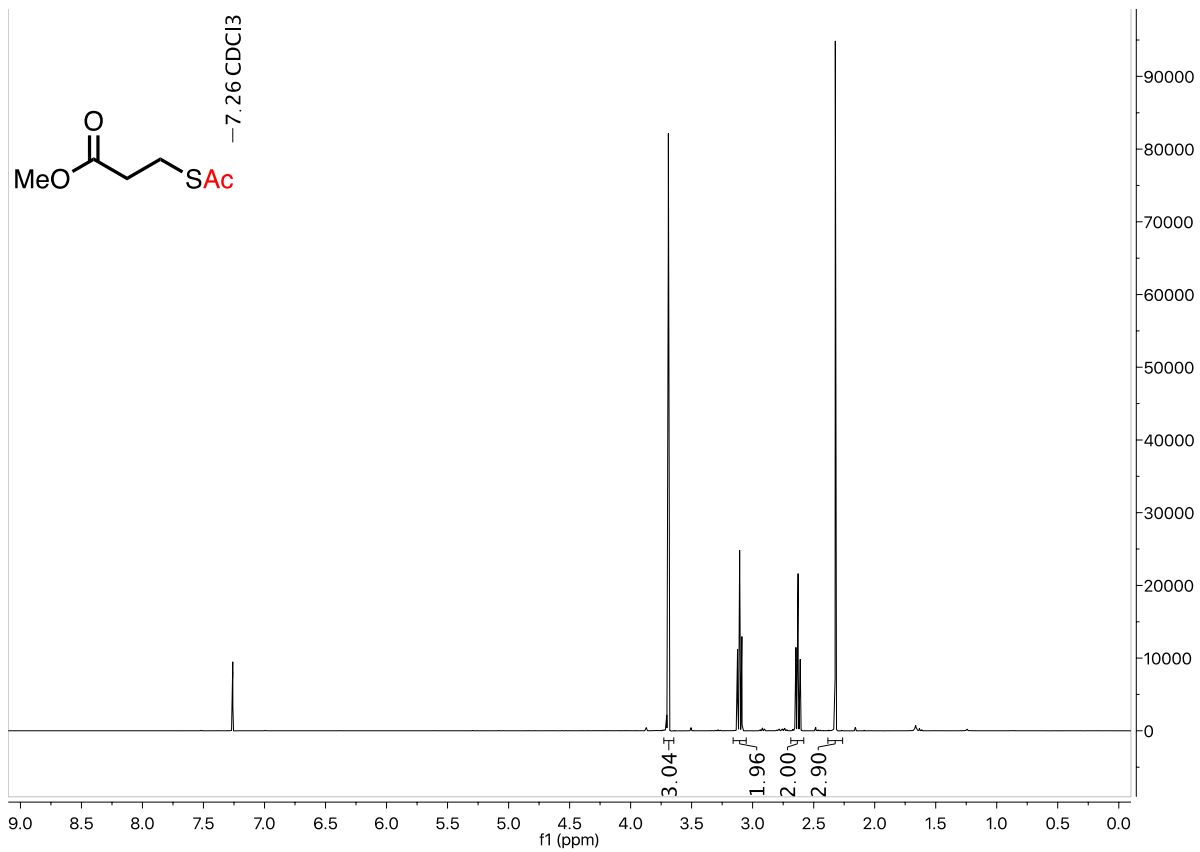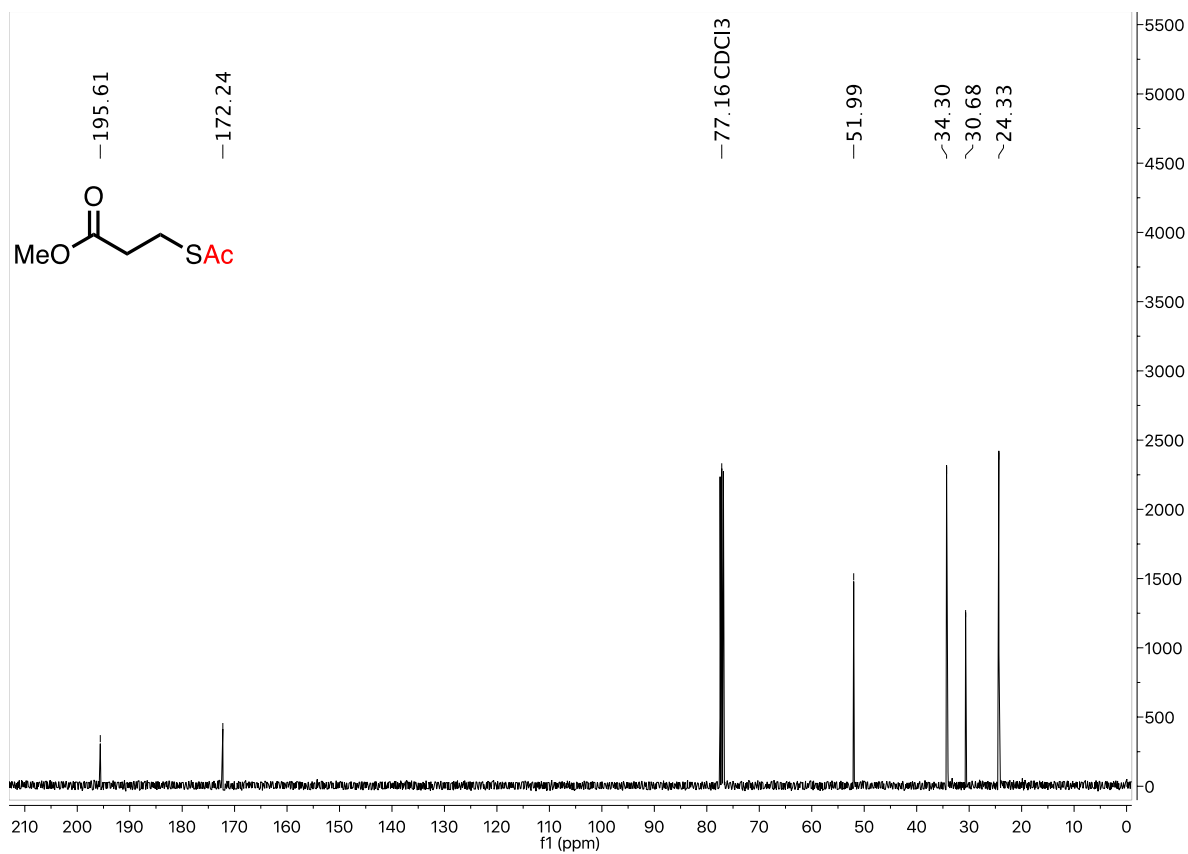

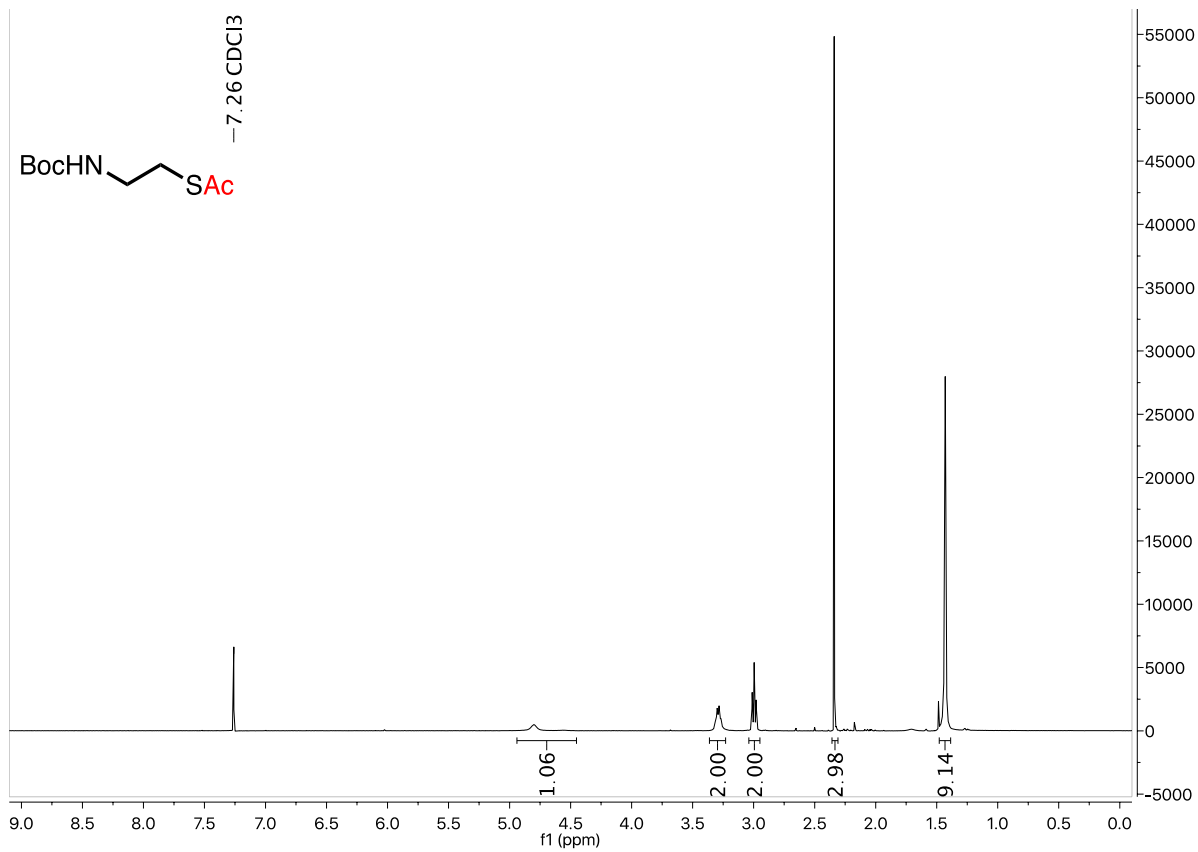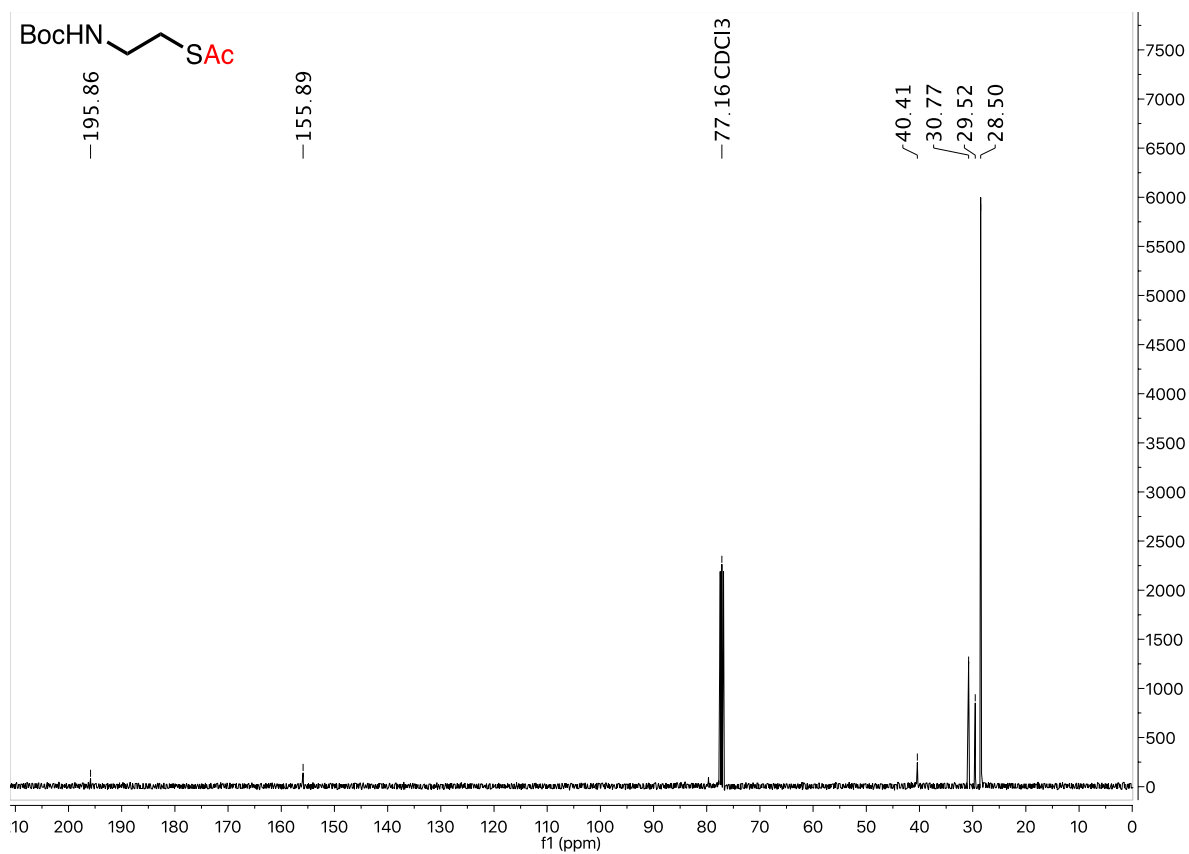

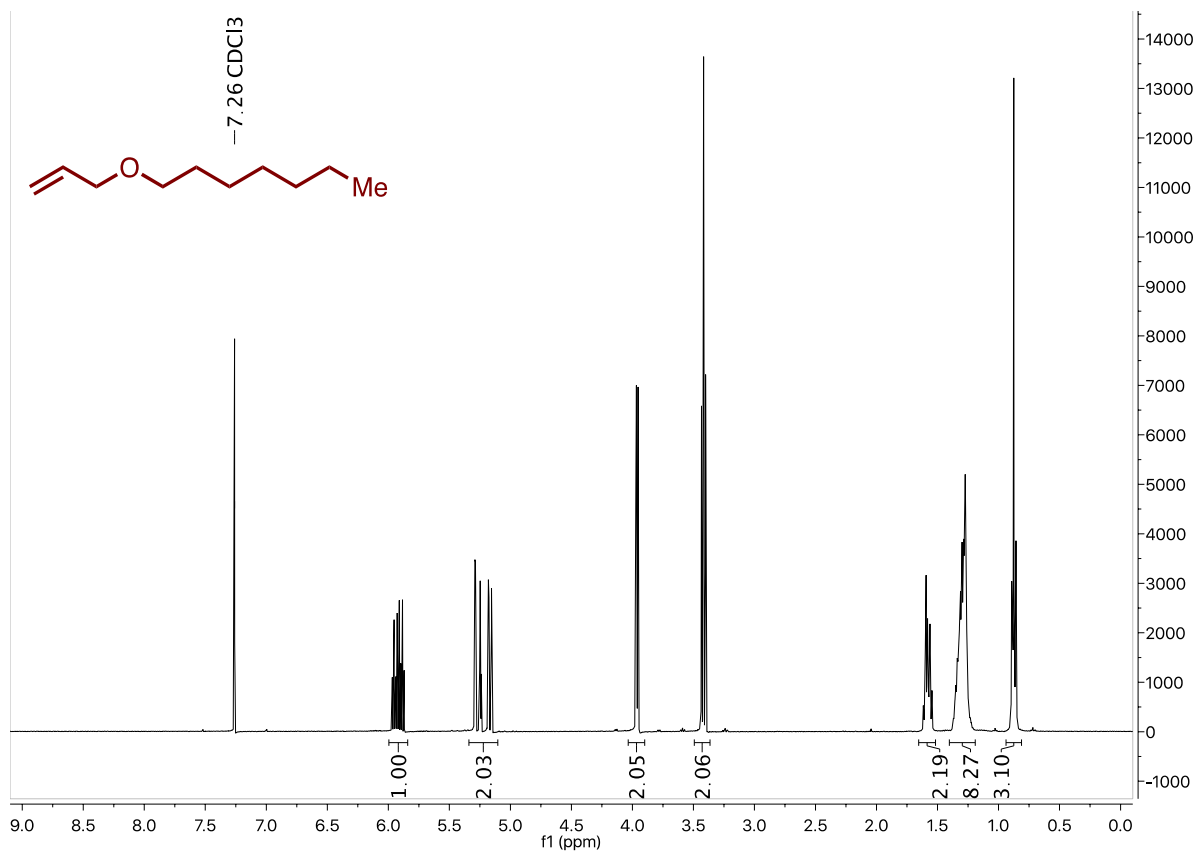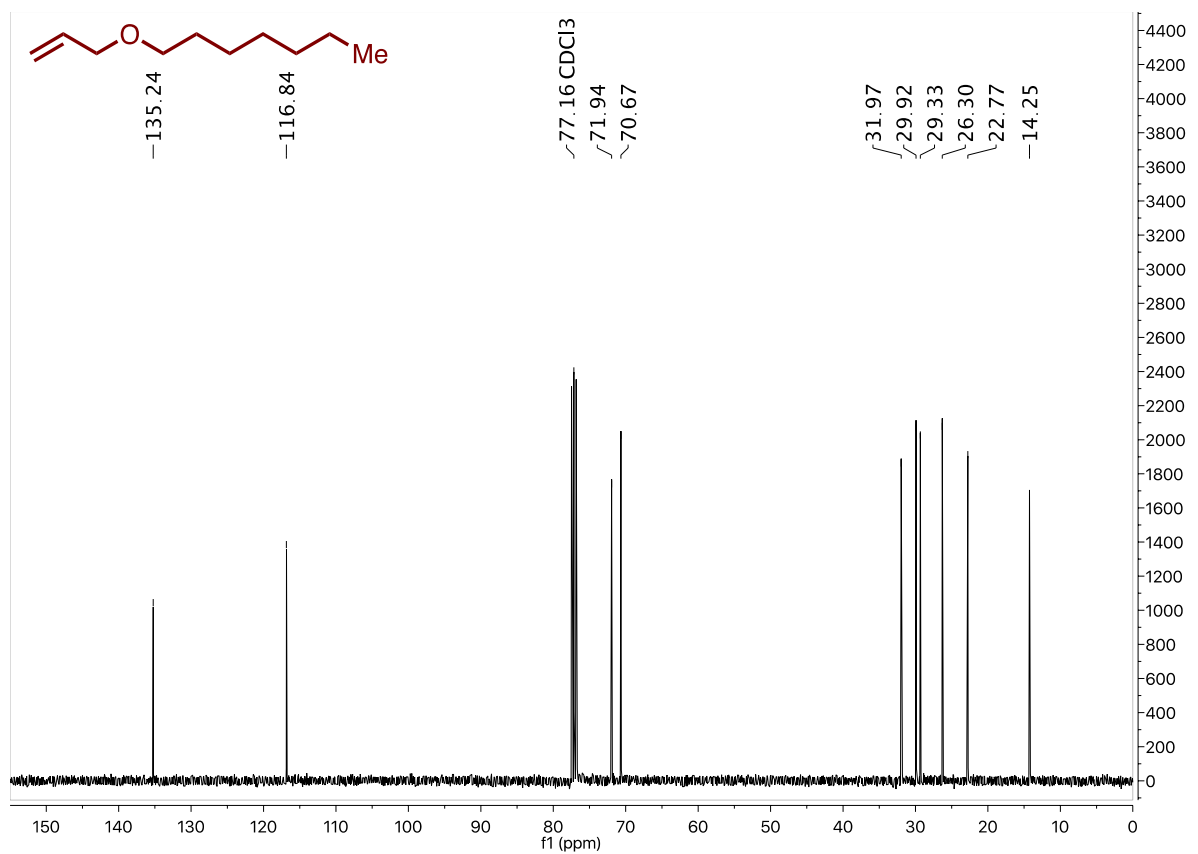

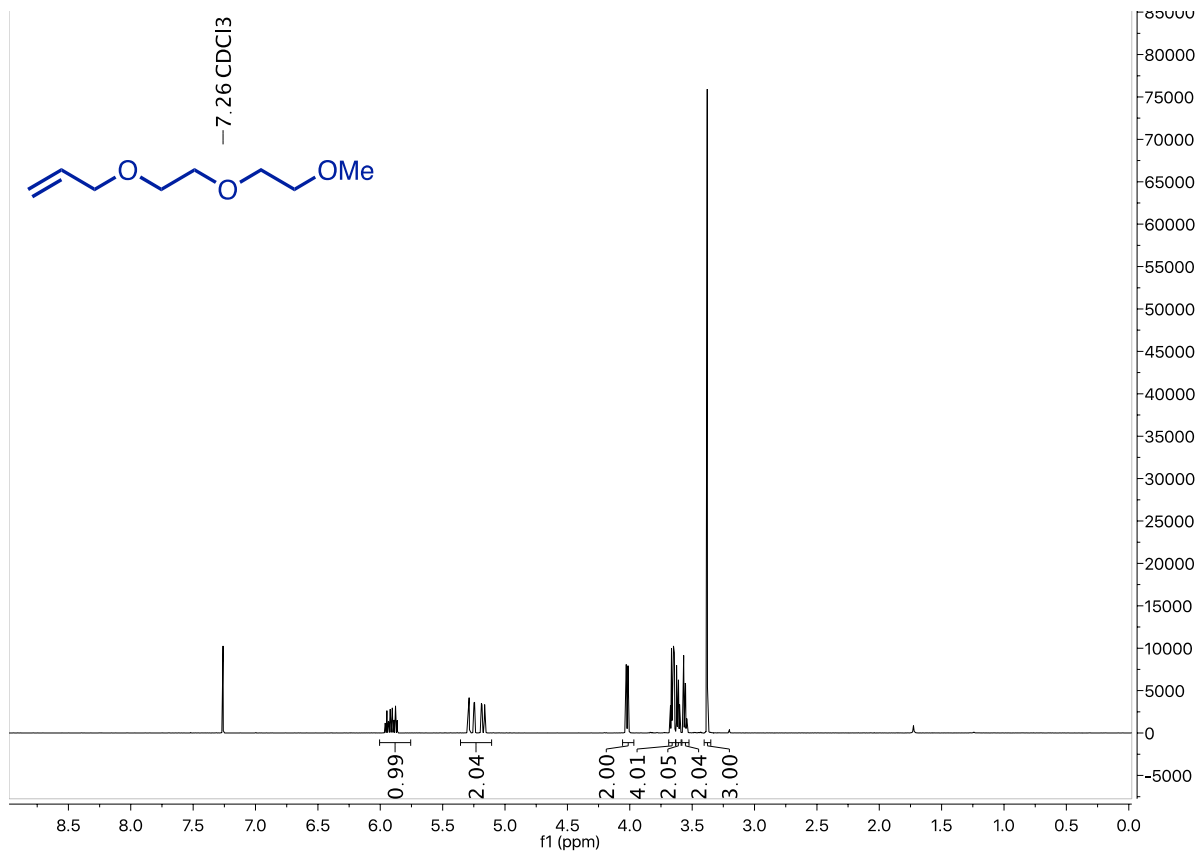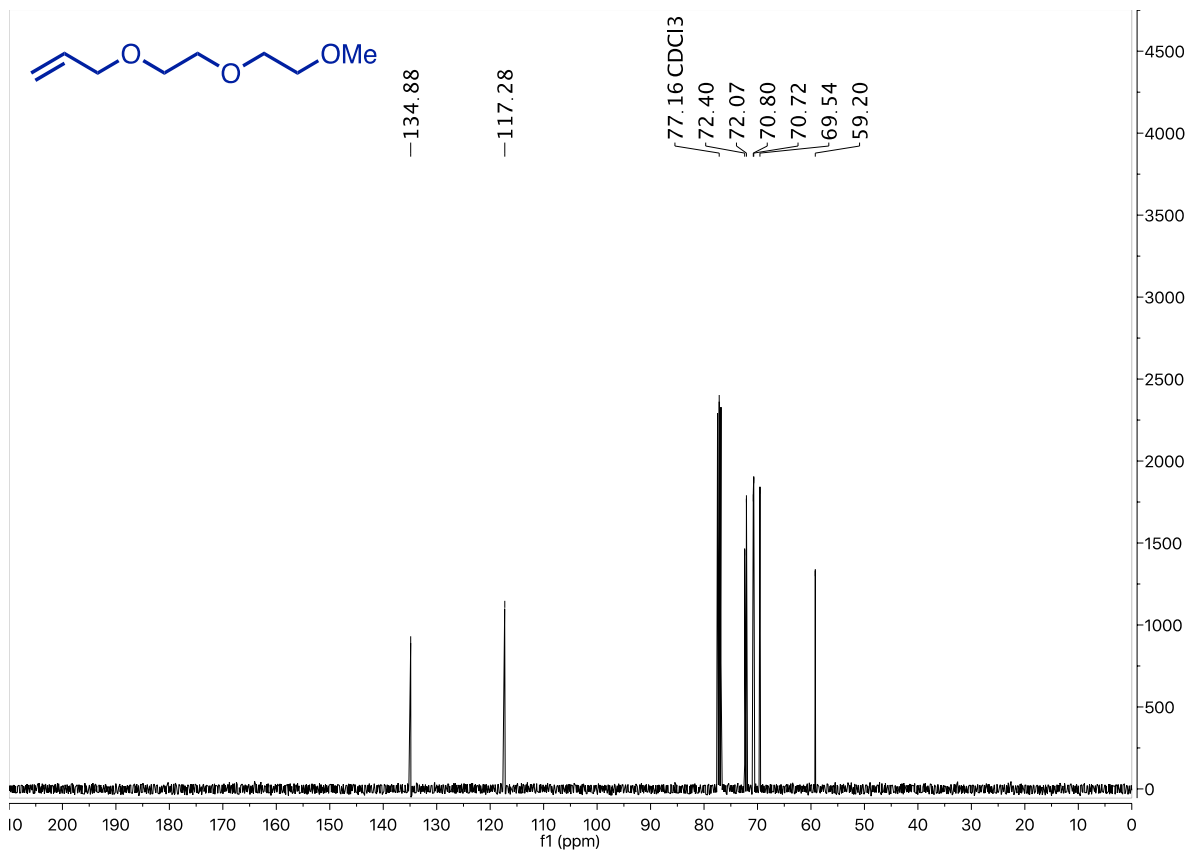

## 5. Calibration Curves

Shown below are calibration curves taken with different thioesters in deuterated solvents. *Ratio to aromatic* = aromatic peak of internal standard; *ratio to aliphatic* = aliphatic peak of internal standard; *thioester* = mole percentage of thioester used. For further experimental details on how this data was generated, see above (page 3 of this document). Both the thioester and solvent used are defined in the table above the calibration curves. Calibration curves with respect to the two characteristic peaks of the internal standard were generated (left – w.r.t. aromatic, right – w.r.t. aliphatic).

| thiophenol (1a) in D <sub>6</sub> -Benzene |                           |                  |
|--------------------------------------------|---------------------------|------------------|
| <i>ratio to aromatic</i>                   | <i>ratio to aliphatic</i> | <i>thioester</i> |
| 0                                          | 0                         | 0                |
| 1.05                                       | 0.34                      | 25               |
| 2.48                                       | 0.79                      | 50               |
| 3.9                                        | 1.25                      | 75               |
| 4.95                                       | 1.6                       | 100              |

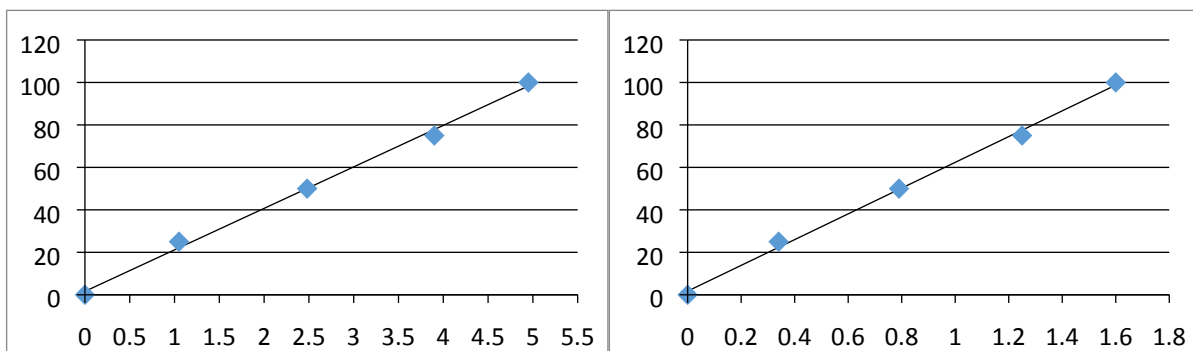

| <b>thiophenol (1a) in D<sub>8</sub>-THF</b> |                           |                  |
|---------------------------------------------|---------------------------|------------------|
| <i>ratio to aromatic</i>                    | <i>ratio to aliphatic</i> | <i>thioester</i> |
| 0                                           | 0                         | 0                |
| 1.21                                        | 0.38                      | 25               |
| 2.39                                        | 0.79                      | 50               |
| 3.58                                        | 1.13                      | 75               |
| 4.93                                        | 1.56                      | 100              |

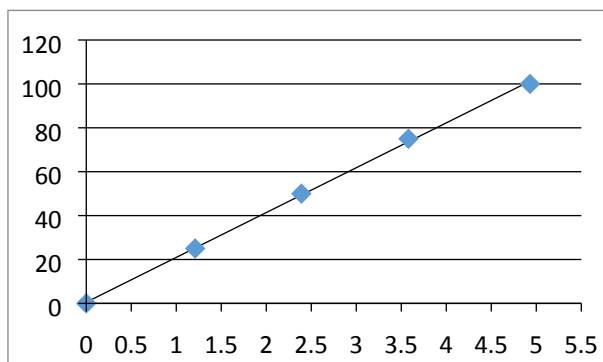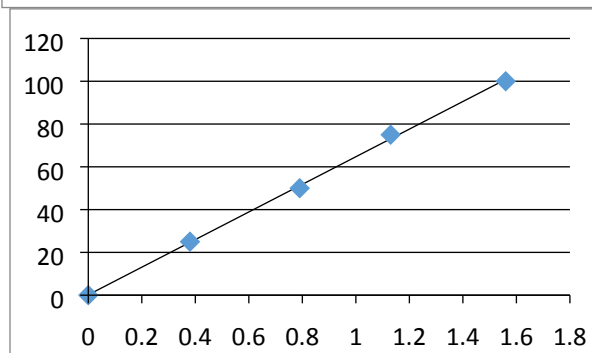

| <b>thiophenol (1a) in CDCl<sub>3</sub></b> |                           |                  |
|--------------------------------------------|---------------------------|------------------|
| <i>ratio to aromatic</i>                   | <i>ratio to aliphatic</i> | <i>thioester</i> |
| 0                                          | 0                         | 0                |
| 1.14                                       | 0.37                      | 25               |
| 2.37                                       | 0.76                      | 50               |
| 3.69                                       | 1.18                      | 75               |
| 4.47                                       | 1.43                      | 100              |



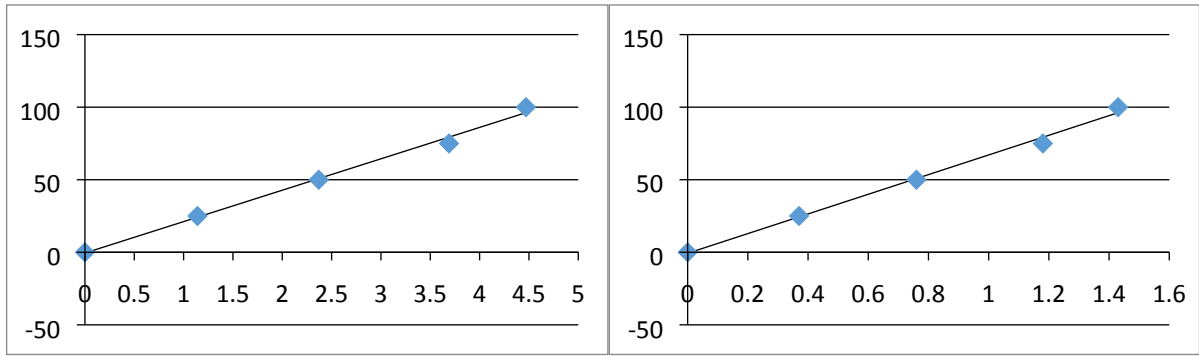

| <b>thiophenol (1a) in D<sub>3</sub>-MeCN</b> |                           |                  |
|----------------------------------------------|---------------------------|------------------|
| <i>ratio to aromatic</i>                     | <i>ratio to aliphatic</i> | <i>thioester</i> |
| 0                                            | 0                         | 0                |
| 1.28                                         | 0.39                      | 25               |
| 2.5                                          | 0.77                      | 50               |
| 3.75                                         | 1.18                      | 75               |
| 5.23                                         | 1.6                       | 100              |

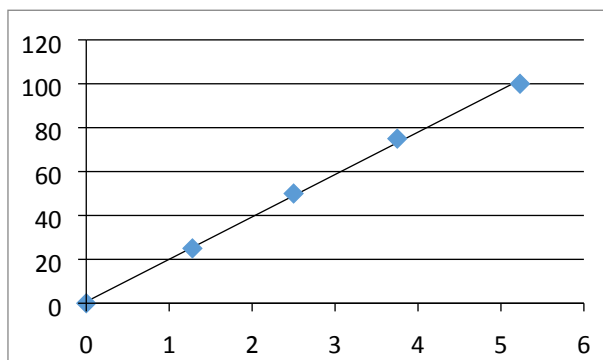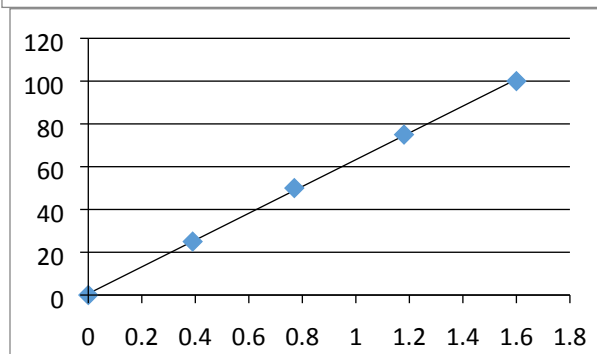

| <b>thiophenol (1a) in D<sub>6</sub>-DMSO</b> |                           |                  |
|----------------------------------------------|---------------------------|------------------|
| <i>ratio to aromatic</i>                     | <i>ratio to aliphatic</i> | <i>thioester</i> |
| 0                                            | 0                         | 0                |
| 1.2                                          | 0.4                       | 25               |
| 2.4                                          | 0.78                      | 50               |
| 3.62                                         | 1.18                      | 75               |
| 4.77                                         | 1.56                      | 100              |

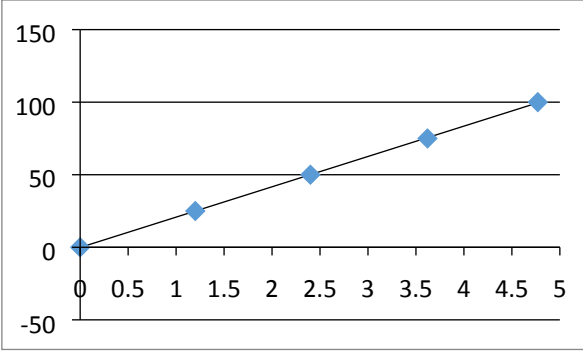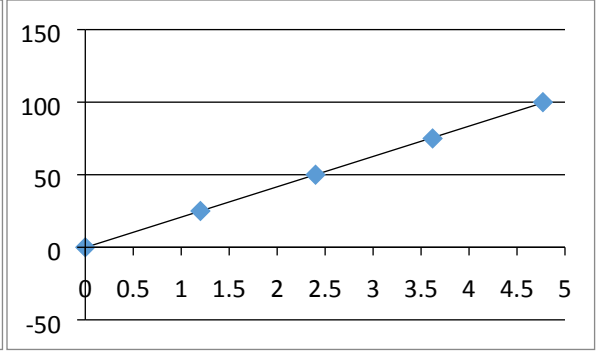

| <b>thiophenol (1a) in D<sub>3</sub>-MeOD</b> |                           |                  |
|----------------------------------------------|---------------------------|------------------|
| <i>ratio to aromatic</i>                     | <i>ratio to aliphatic</i> | <i>thioester</i> |
| 0                                            | 0                         | 0                |
| 1.27                                         | 0.41                      | 25               |
| 2.54                                         | 0.81                      | 50               |
| 3.79                                         | 1.21                      | 75               |
| 5.07                                         | 1.63                      | 100              |

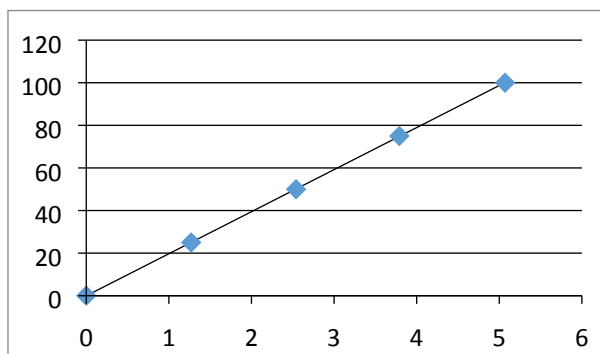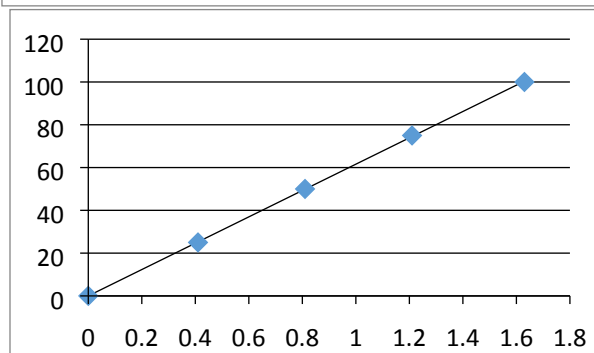

| <b>2-mercaptopyridine (1b) in D<sub>6</sub>-Benzene</b> |                           |                  |
|---------------------------------------------------------|---------------------------|------------------|
| <i>ratio to aromatic</i>                                | <i>ratio to aliphatic</i> | <i>thioester</i> |
| 0                                                       | 0                         | 0                |
| 1.18                                                    | 0.38                      | 25               |
| 2.33                                                    | 0.75                      | 50               |
| 3.54                                                    | 1.14                      | 75               |
| 4.58                                                    | 1.48                      | 100              |

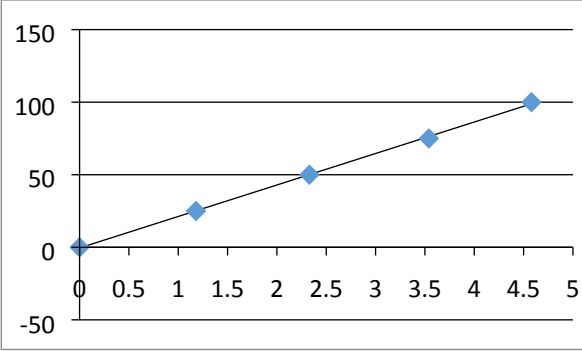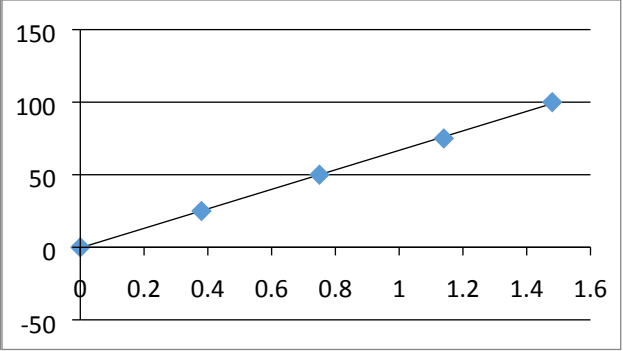

| <b>2-mercaptopyridine (1b) in D<sub>8</sub>-THF</b> |                           |                  |
|-----------------------------------------------------|---------------------------|------------------|
| <i>ratio to aromatic</i>                            | <i>ratio to aliphatic</i> | <i>thioester</i> |
| 0                                                   | 0                         | 0                |
| 1.2                                                 | 0.38                      | 25               |
| 2.31                                                | 0.74                      | 50               |
| 3.36                                                | 1.09                      | 75               |
| 4.32                                                | 1.37                      | 100              |

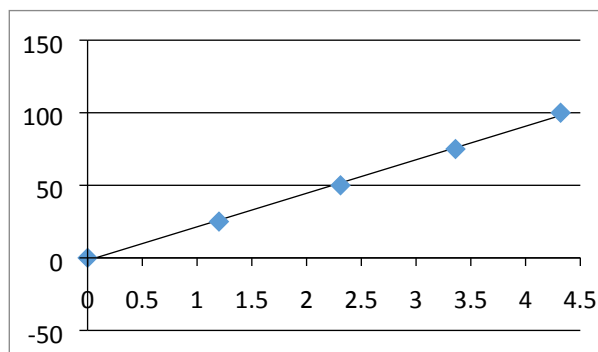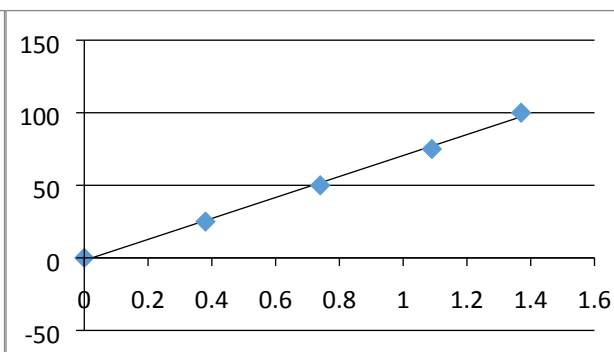

| <b>2-mercaptopyridine (1b) in CDCl<sub>3</sub></b> |                           |                  |
|----------------------------------------------------|---------------------------|------------------|
| <i>ratio to aromatic</i>                           | <i>ratio to aliphatic</i> | <i>thioester</i> |
| 0                                                  | 0                         | 0                |
| 1.02                                               | 0.33                      | 25               |
| 2.43                                               | 0.77                      | 50               |
| 3.64                                               | 1.16                      | 75               |
| 4.71                                               | 1.5                       | 100              |

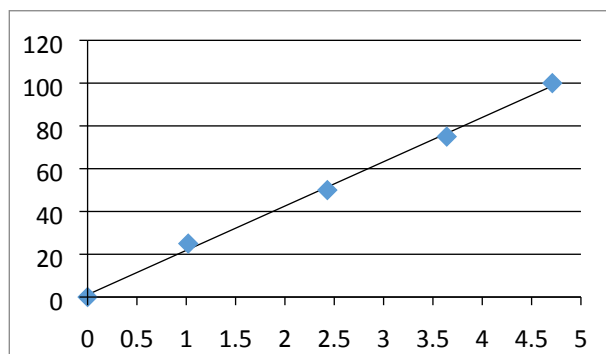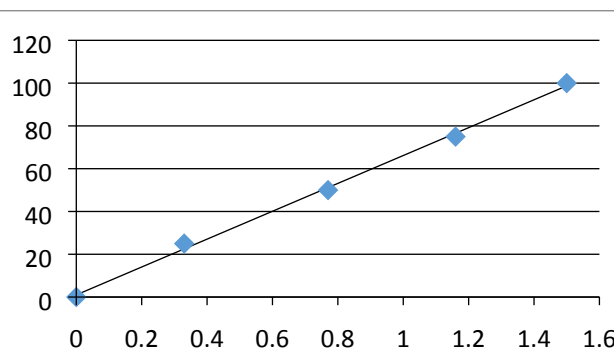

| <b>2-mercaptopyridine (1b) in D<sub>3</sub>-MeCN</b> |                           |                  |
|------------------------------------------------------|---------------------------|------------------|
| <i>ratio to aromatic</i>                             | <i>ratio to aliphatic</i> | <i>thioester</i> |
| 0                                                    | 0                         | 0                |
| 1.18                                                 | 0.37                      | 25               |
| 2.44                                                 | 0.74                      | 50               |
| 3.53                                                 | 1.11                      | 75               |
| 4.59                                                 | 1.44                      | 100              |

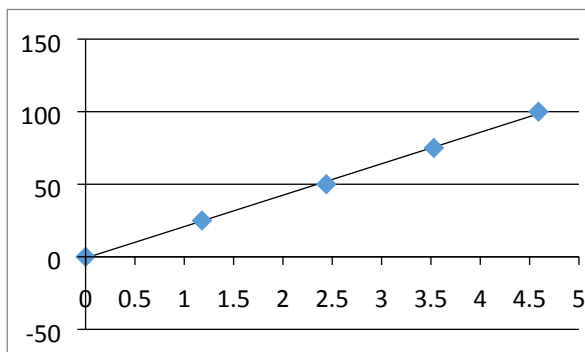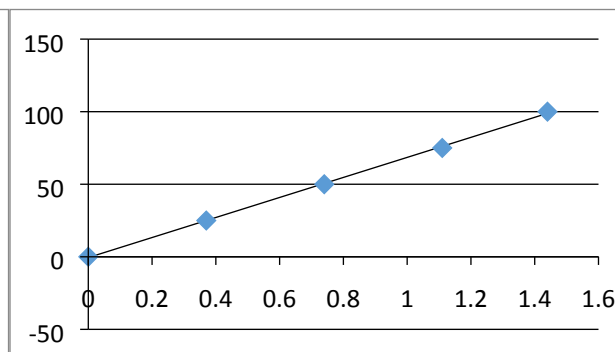

| <b>2-mercaptopyridine (1b) in D<sub>6</sub>-DMSO</b> |                           |                  |
|------------------------------------------------------|---------------------------|------------------|
| <i>ratio to aromatic</i>                             | <i>ratio to aliphatic</i> | <i>thioester</i> |
| 0                                                    | 0                         | 0                |
| 1.06                                                 | 0.35                      | 25               |
| 2.19                                                 | 0.72                      | 50               |
| 3.26                                                 | 1.08                      | 75               |
| 4.33                                                 | 1.41                      | 100              |

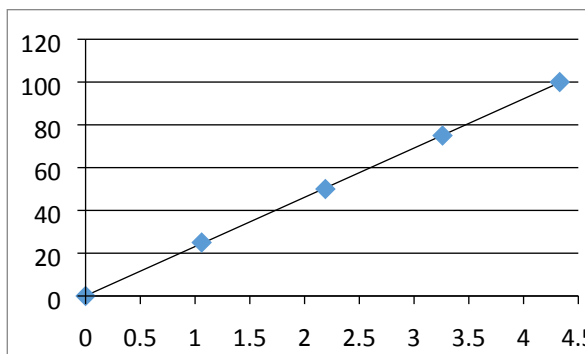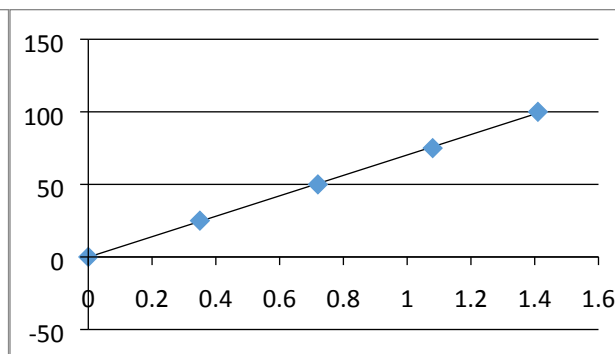

| <b>2-mercaptopyridine (1b) in D<sub>3</sub>-MeOD</b> |                           |                  |
|------------------------------------------------------|---------------------------|------------------|
| <i>ratio to aromatic</i>                             | <i>ratio to aliphatic</i> | <i>thioester</i> |
| 0                                                    | 0                         | 0                |
| 0.89                                                 | 0.29                      | 25               |
| 1.59                                                 | 0.51                      | 50               |
| 2.79                                                 | 0.91                      | 75               |
| 3.73                                                 | 1.22                      | 100              |

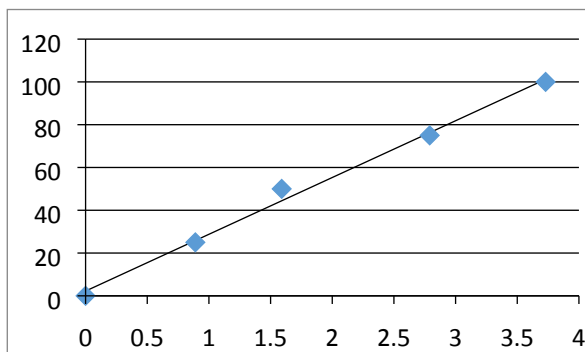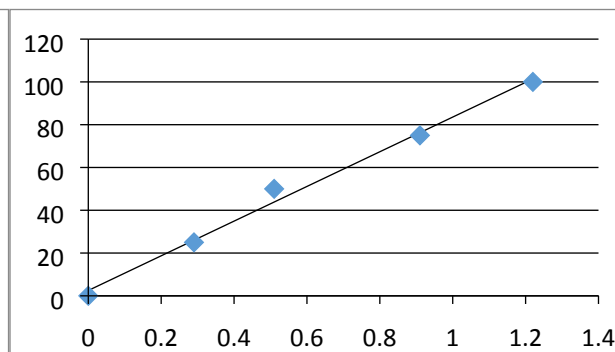

| <b>n-octanthiol (1c) in D<sub>6</sub>-Benzene</b> |                           |                  |
|---------------------------------------------------|---------------------------|------------------|
| <i>ratio to aromatic</i>                          | <i>ratio to aliphatic</i> | <i>thioester</i> |
| 0                                                 | 0                         | 0                |
| 1.19                                              | 0.38                      | 25               |
| 2.35                                              | 0.76                      | 50               |
| 3.51                                              | 1.13                      | 75               |
| 4.54                                              | 1.44                      | 100              |

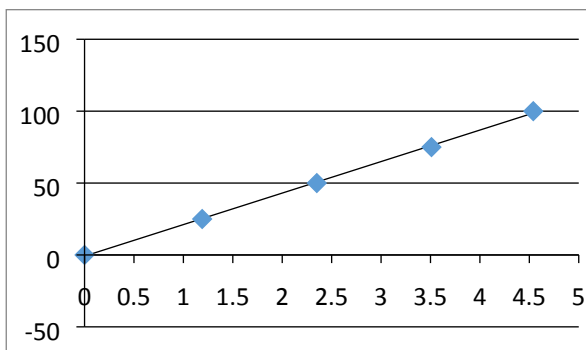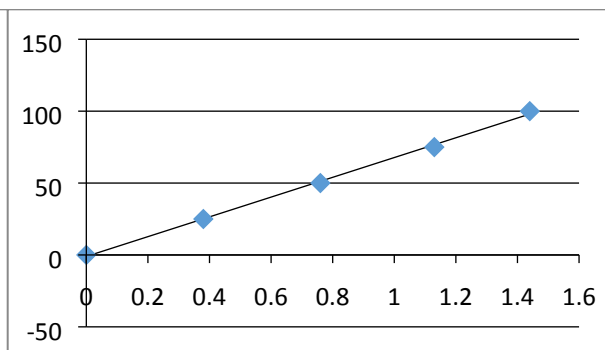



| <b>n-octanethiol (1c) in D<sub>8</sub>-THF</b> |                           |                  |
|------------------------------------------------|---------------------------|------------------|
| <i>ratio to aromatic</i>                       | <i>ratio to aliphatic</i> | <i>thioester</i> |
| 0                                              | 0                         | 0                |
| 1.22                                           | 0.39                      | 25               |
| 2.44                                           | 0.79                      | 50               |
| 3.73                                           | 1.18                      | 75               |
| 4.42                                           | 1.41                      | 100              |

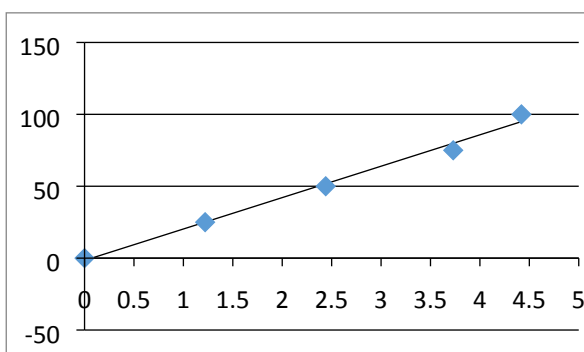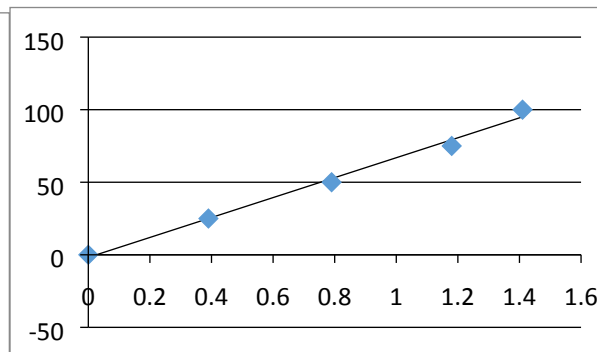

| <b>n-octanethiol (1c) in CDCl<sub>3</sub></b> |                           |                  |
|-----------------------------------------------|---------------------------|------------------|
| <i>ratio to aromatic</i>                      | <i>ratio to aliphatic</i> | <i>thioester</i> |
| 0                                             | 0                         | 0                |
| 1.07                                          | 0.4                       | 25               |
| 2.24                                          | 0.79                      | 50               |
| 3.41                                          | 1.13                      | 75               |
| 4.67                                          | 1.55                      | 100              |

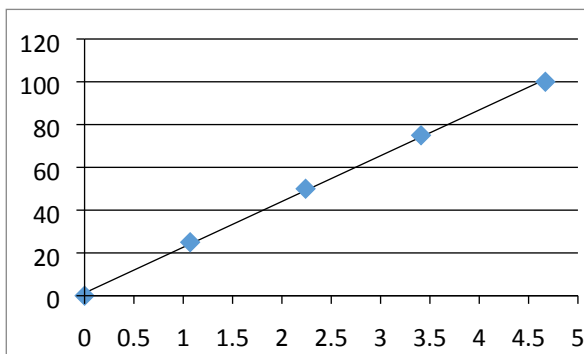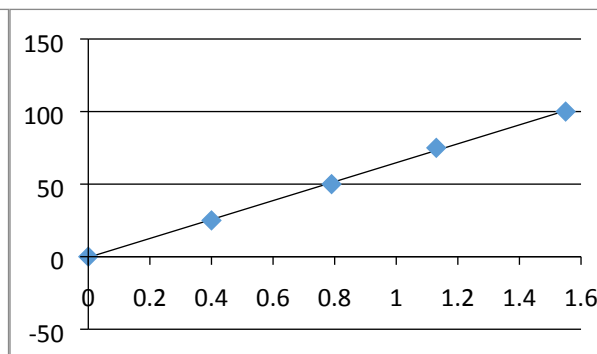

| <b>n-octanethiol (1c) in D<sub>3</sub>-MeCN</b> |                           |                  |
|-------------------------------------------------|---------------------------|------------------|
| <i>ratio to aromatic</i>                        | <i>ratio to aliphatic</i> | <i>thioester</i> |
| 0                                               | 0                         | 0                |
| 1.26                                            | 0.4                       | 25               |
| 2.54                                            | 0.79                      | 50               |
| 3.51                                            | 1.13                      | 75               |
| 4.71                                            | 1.55                      | 100              |

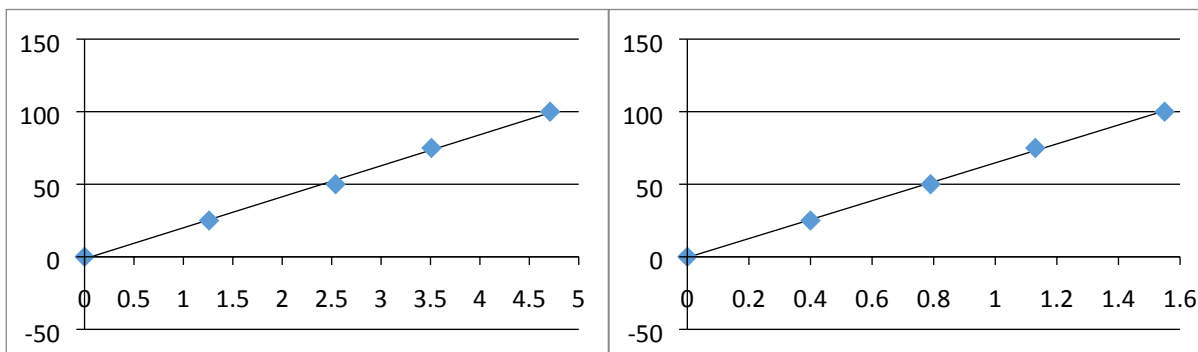

| <b>n-octanethiol (1c) in D<sub>6</sub>-DMSO</b> |                          |                  |
|-------------------------------------------------|--------------------------|------------------|
| <i>ratio to aliphatic</i>                       | <i>ratio to aromatic</i> | <i>thioester</i> |
| 0                                               | 0                        | 0                |
| 1.23                                            | 0.4                      | 25               |
| 2.36                                            | 0.78                     | 50               |
| 3.57                                            | 1.18                     | 75               |
| 4.75                                            | 1.55                     | 100              |

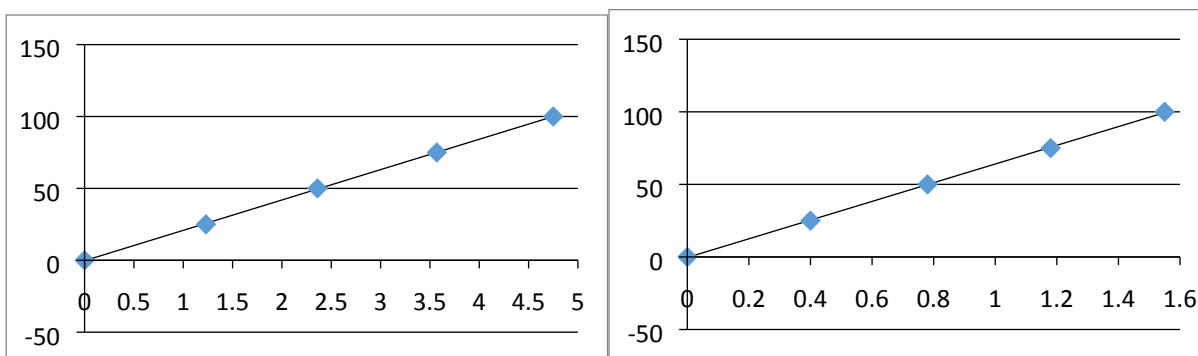

| <b>n-octanethiol (1c) in D<sub>3</sub>-MeOD</b> |                           |                  |
|-------------------------------------------------|---------------------------|------------------|
| <i>ratio to aromatic</i>                        | <i>ratio to aliphatic</i> | <i>thioester</i> |
| 0                                               | 0                         | 0                |
| 1.24                                            | 0.4                       | 25               |
| 2.42                                            | 0.77                      | 50               |
| 3.51                                            | 1.12                      | 75               |
| 4.59                                            | 1.48                      | 100              |

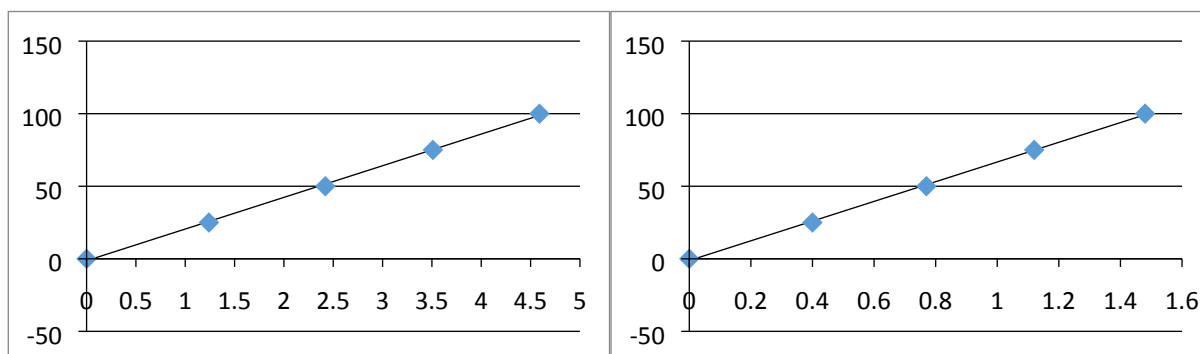

| <b>methyl-mercaptopropionate (1d) in D<sub>6</sub>-benzene</b> |                           |                  |
|----------------------------------------------------------------|---------------------------|------------------|
| <i>ratio to aromatic</i>                                       | <i>ratio to aliphatic</i> | <i>thioester</i> |
| 0                                                              | 0                         | 0                |
| 1.19                                                           | 0.38                      | 25               |
| 2.34                                                           | 0.74                      | 50               |
| 3.41                                                           | 1.1                       | 75               |
| 4.63                                                           | 1.5                       | 100              |

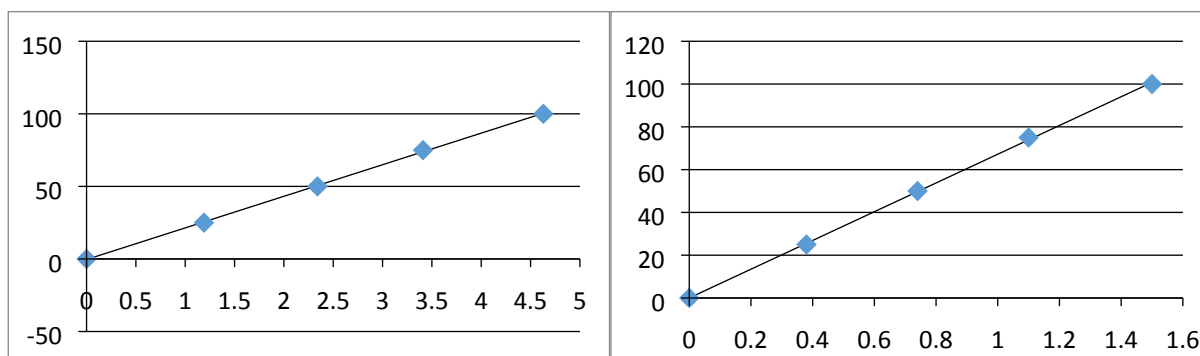

| methyl-mercaptopropionate (1d) in D <sub>8</sub> -THF |                           |                  |
|-------------------------------------------------------|---------------------------|------------------|
| <i>ratio to aromatic</i>                              | <i>ratio to aliphatic</i> | <i>thioester</i> |
| 0                                                     | 0                         | 0                |
| 1.12                                                  | 0.36                      | 25               |
| 2.52                                                  | 0.8                       | 50               |
| 3.52                                                  | 1.12                      | 75               |
| 4.64                                                  | 1.48                      | 100              |

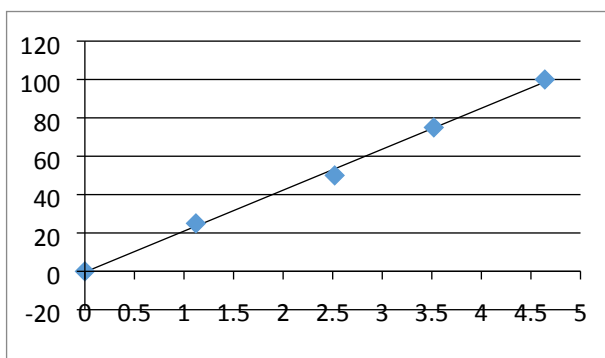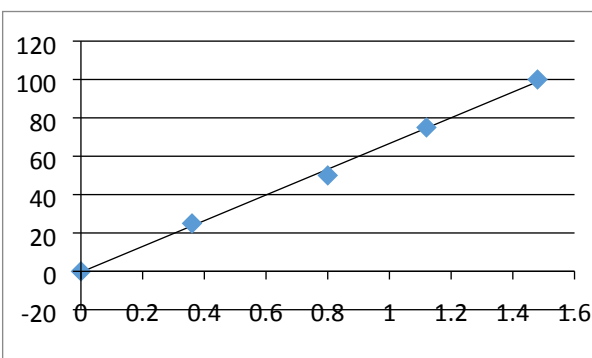

| methyl-mercaptopropionate (1d) in CDCl <sub>3</sub> |                           |                  |
|-----------------------------------------------------|---------------------------|------------------|
| <i>ratio to aromatic</i>                            | <i>ratio to aliphatic</i> | <i>thioester</i> |
| 0                                                   | 0                         | 0                |
| 1.26                                                | 0.4                       | 25               |
| 2.43                                                | 0.78                      | 50               |
| 3.59                                                | 1.15                      | 75               |
| 4.85                                                | 1.55                      | 100              |

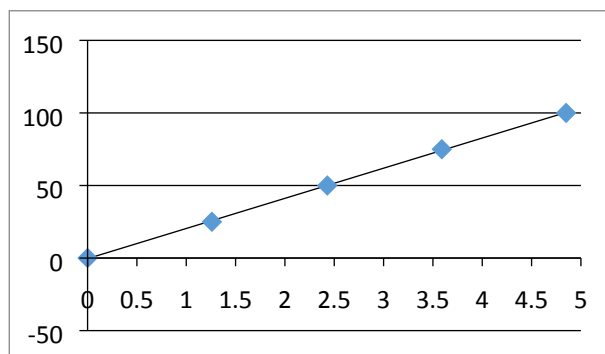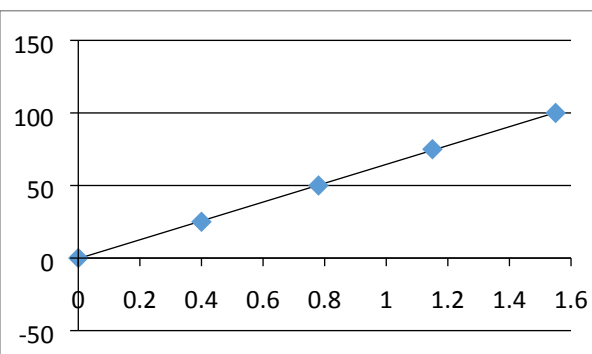

| <b>methyl-mercaptopropionate (1d) in D<sub>3</sub>-MeCN</b> |                           |                  |
|-------------------------------------------------------------|---------------------------|------------------|
| <i>ratio to aromatic</i>                                    | <i>ratio to aliphatic</i> | <i>thioester</i> |
| 0                                                           | 0                         | 0                |
| 1.15                                                        | 0.37                      | 25               |
| 2.08                                                        | 0.66                      | 50               |
| 3.8                                                         | 1.2                       | 75               |
| 4.99                                                        | 1.58                      | 100              |

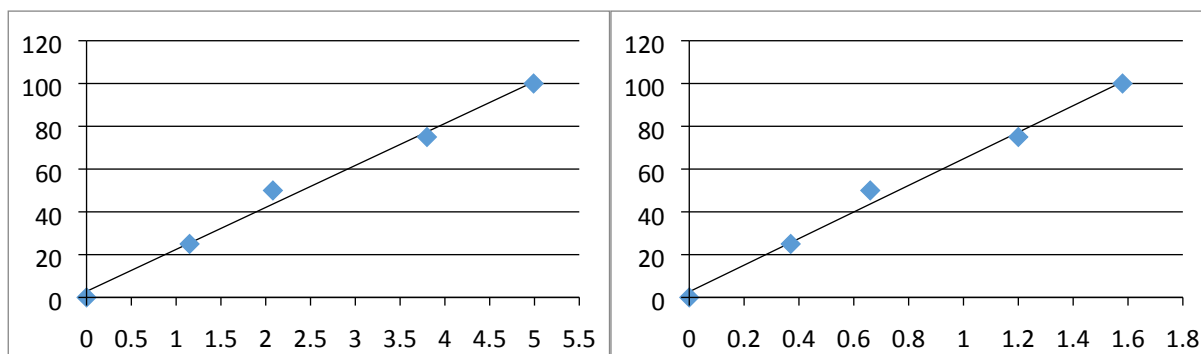

| <b>methyl-mercaptopropionate (1d) in D<sub>6</sub>-DMSO</b> |                           |                  |
|-------------------------------------------------------------|---------------------------|------------------|
| <i>ratio to aromatic</i>                                    | <i>ratio to aliphatic</i> | <i>thioester</i> |
| 0                                                           | 0                         | 0                |
| 1.16                                                        | 0.38                      | 25               |
| 2.32                                                        | 0.77                      | 50               |
| 3.44                                                        | 1.13                      | 75               |
| 4.55                                                        | 1.48                      | 100              |

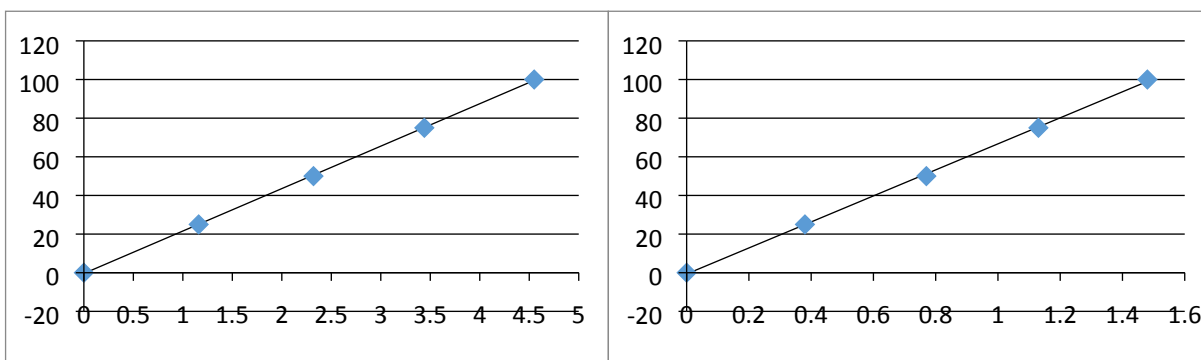

| <b>methyl-mercaptopropionate (1d) in D<sub>3</sub>-MeOD</b> |                           |                  |
|-------------------------------------------------------------|---------------------------|------------------|
| <i>ratio to aromatic</i>                                    | <i>ratio to aliphatic</i> | <i>thioester</i> |
| 1.16                                                        | 0.38                      | 25               |
| 2.34                                                        | 0.75                      | 50               |
| 3.57                                                        | 1.15                      | 75               |
| 5.73                                                        | 1.84                      | 100              |

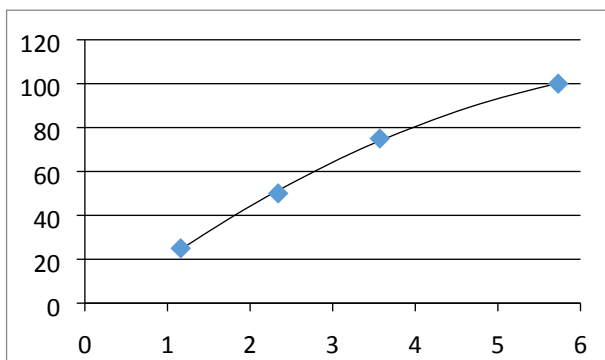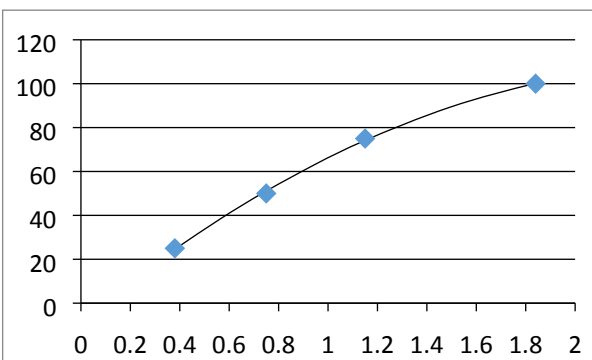

| <b>boc-cystemine (1e) in D<sub>6</sub>-Benzene</b> |                           |                  |
|----------------------------------------------------|---------------------------|------------------|
| <i>ratio to aromatic</i>                           | <i>ratio to aliphatic</i> | <i>thioester</i> |
| 0                                                  | 0                         | 0                |
| 1.21                                               | 0.39                      | 25               |
| 2.37                                               | 0.76                      | 50               |
| 3.6                                                | 1.14                      | 75               |
| 4.87                                               | 1.55                      | 100              |

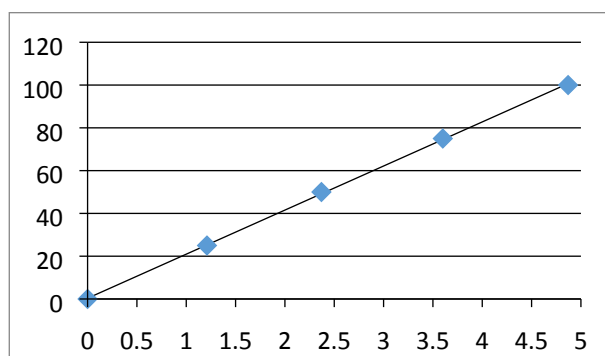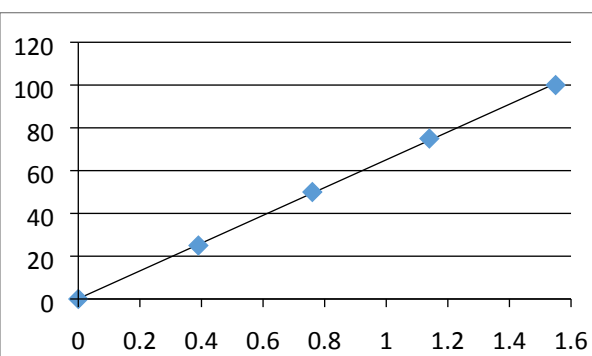

| <b>boc-cystemine (1e) in D<sub>8</sub>-THF</b> |                           |                  |
|------------------------------------------------|---------------------------|------------------|
| <i>ratio to aromatic</i>                       | <i>ratio to aliphatic</i> | <i>thioester</i> |
| 0                                              | 0                         | 0                |
| 1.21                                           | 0.39                      | 25               |
| 2.42                                           | 0.79                      | 50               |
| 3.54                                           | 1.16                      | 75               |
| 4.58                                           | 1.5                       | 100              |

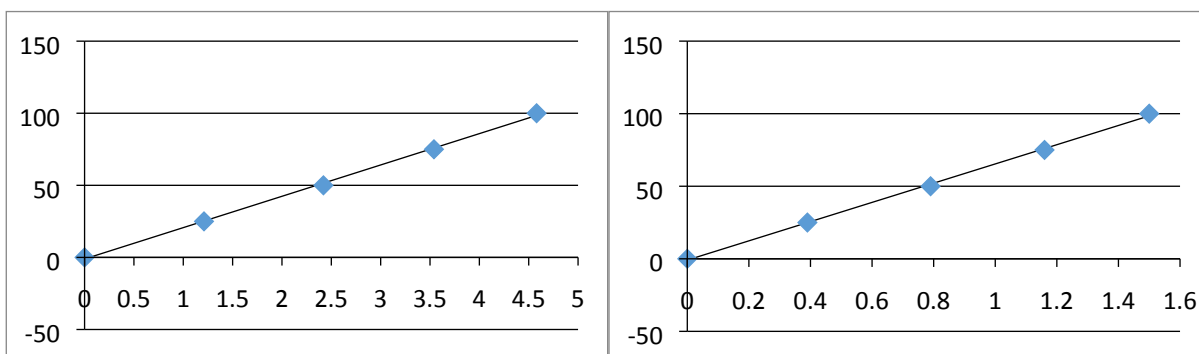

| <b>boc-cystemine (1e) in CDCl<sub>3</sub></b> |                           |                  |
|-----------------------------------------------|---------------------------|------------------|
| <i>ratio to aromatic</i>                      | <i>ratio to aliphatic</i> | <i>thioester</i> |
| 0                                             | 0                         | 0                |
| 1.12                                          | 0.36                      | 25               |
| 2.46                                          | 0.79                      | 50               |
| 3.71                                          | 1.19                      | 75               |
| 4.94                                          | 1.56                      | 100              |

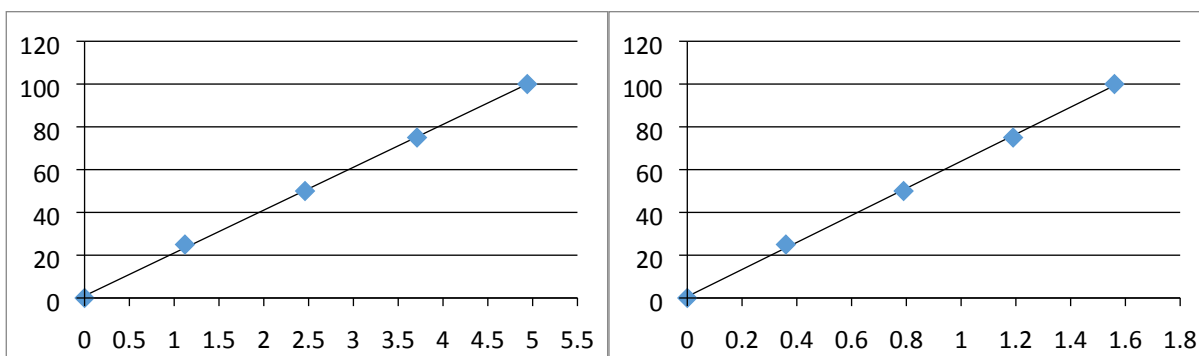

| <b>boc-cystemine (1e) in D<sub>3</sub>-MeCN</b> |                           |                  |
|-------------------------------------------------|---------------------------|------------------|
| <i>ratio to aromatic</i>                        | <i>ratio to aliphatic</i> | <i>thioester</i> |
| 0                                               | 0                         | 0                |
| 1.26                                            | 0.4                       | 25               |
| 2.43                                            | 0.78                      | 50               |
| 3.59                                            | 1.15                      | 75               |
| 4.85                                            | 1.55                      | 100              |

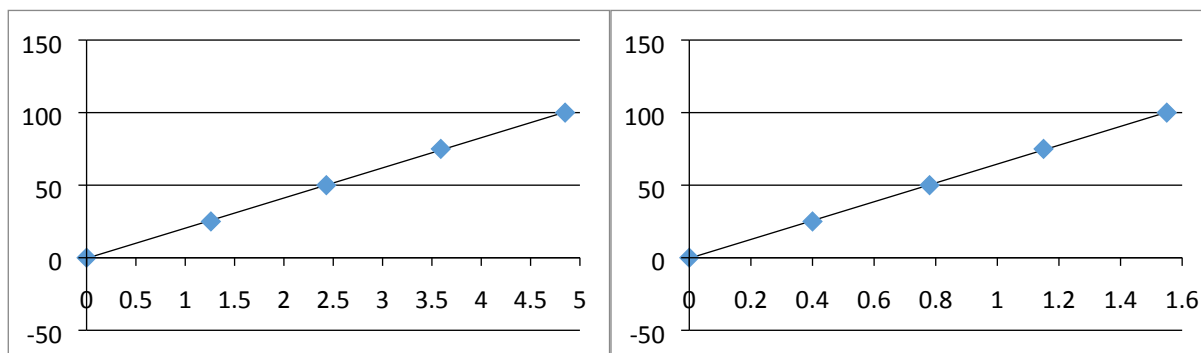

| <b>boc-cystemine (1e) in D<sub>6</sub>-DMSO</b> |                           |                  |
|-------------------------------------------------|---------------------------|------------------|
| <i>ratio to aromatic</i>                        | <i>ratio to aliphatic</i> | <i>thioester</i> |
| 0                                               | 0                         | 0                |
| 1.15                                            | 0.37                      | 25               |
| 2.2                                             | 0.71                      | 50               |
| 3.38                                            | 1.1                       | 75               |
| 4.5                                             | 1.46                      | 100              |

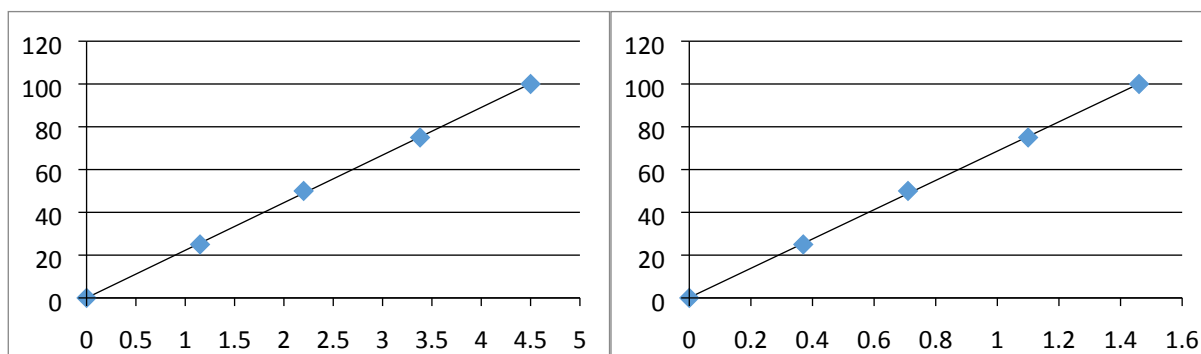



| <b>boc-cystemine (1e) in D<sub>3</sub>-MeOD</b> |                           |                  |
|-------------------------------------------------|---------------------------|------------------|
| <i>ratio to aromatic</i>                        | <i>ratio to aliphatic</i> | <i>thioester</i> |
| 0                                               | 0                         | 0                |
| 1.18                                            | 0.38                      | 25               |
| 2.41                                            | 0.74                      | 50               |
| 3.48                                            | 1.13                      | 75               |
| 4.62                                            | 1.52                      | 100              |

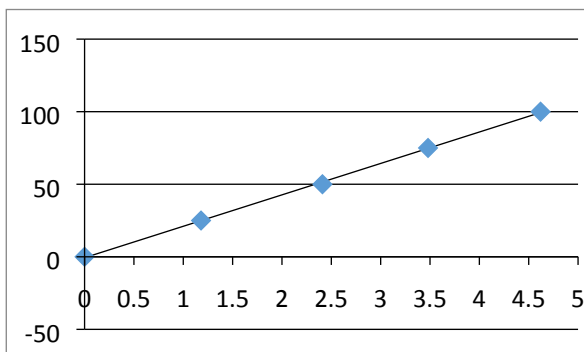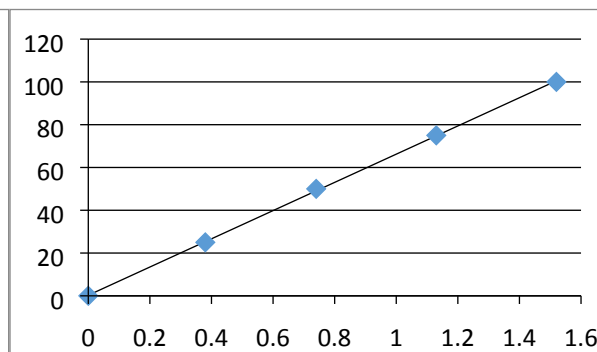

| <b>methyl acetate in D<sub>3</sub>-MeOD</b> |                           |                  |
|---------------------------------------------|---------------------------|------------------|
| <i>ratio to aromatic</i>                    | <i>ratio to aliphatic</i> | <i>thioester</i> |
| 0                                           | 0                         | 0                |
| 0.94                                        | 0.3                       | 25               |
| 2.19                                        | 0.71                      | 50               |
| 3.73                                        | 1.2                       | 75               |
| 4.98                                        | 1.6                       | 100              |

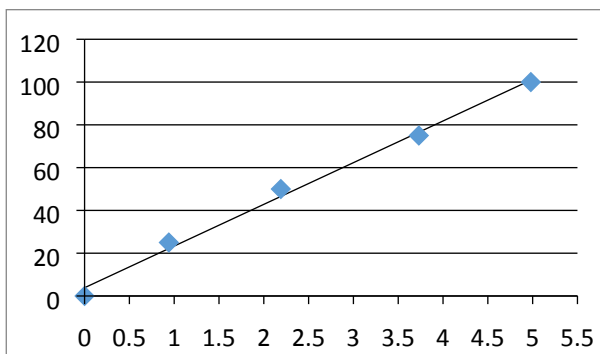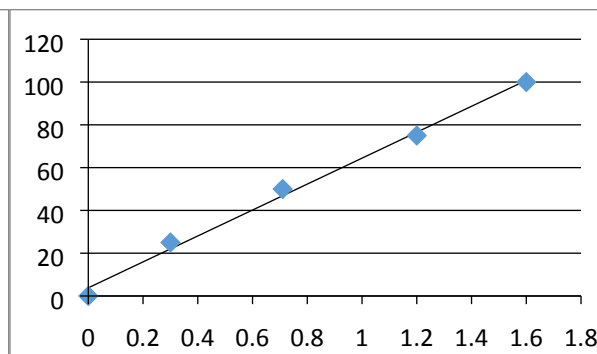

## 6. Raw and Processed Exchange Data

Below are charts of the processed exchange data, the solvent employed as well as the thioester (**1**) and thiol (**2**) exchanged are labeled within the table in context of their use. For further experimental details on how this data was generated and the workflow for generating percentages, see above (page 5 of this document).

Below are the raw and processed data which generated **Fig. 3** of the main manuscript:

| THF          |        | ratio<br>(remaining) | ratio<br>(exchanged) | percent<br>(remaining) | percent<br>(exchanged) | total | avg        | towards      | K <sub>eq</sub> |
|--------------|--------|----------------------|----------------------|------------------------|------------------------|-------|------------|--------------|-----------------|
| <b>1a/2b</b> | IS-Aro | 4.55                 |                      | 93.4704                |                        | 93    |            |              |                 |
|              | IS-Ali | 1.44                 |                      | 93.113                 |                        | 93    | <b>93</b>  | -            | -               |
| <b>1a/2c</b> | IS-Aro | 4.52                 |                      | 92.85756               |                        | 93    |            |              |                 |
|              | IS-Ali | 1.44                 |                      | 93.113                 |                        | 93    | <b>93</b>  | -            | -               |
| <b>1a/2d</b> | IS-Aro | 4.56                 |                      | 93.67468               |                        | 94    |            |              |                 |
|              | IS-Ali | 1.46                 |                      | 94.4038                |                        | 94    | <b>94</b>  | -            | -               |
| <b>1a/2e</b> | IS-Aro | 4.51                 |                      | 92.65328               |                        | 93    |            |              |                 |
|              | IS-Ali | 1.46                 |                      | 94.4038                |                        | 94    | <b>94</b>  | -            | -               |
| <b>1b/2a</b> | IS-Aro | 2.24                 | 2.38                 | 50.04668               | 53.28166               | 103   |            |              |                 |
|              | IS-Ali | 0.73                 | 0.77                 | 51.01149               | 53.90161               | 105   | <b>104</b> | <b>TE/SH</b> | <b>1.06</b>     |
| <b>1b/2c</b> | IS-Aro | 3.12                 | 1.27                 | 70.38084               | 27.63289               | 98    |            |              |                 |
|              | IS-Ali | 1.02                 | 0.42                 | 71.96486               | 28.61306               | 101   | <b>99</b>  | <b>TE</b>    | <b>0.40</b>     |
| <b>1b/2d</b> | IS-Aro | 2.75                 | 1.57                 | 61.83125               | 34.56499               | 96    |            |              |                 |
|              | IS-Ali | 0.9                  | 0.51                 | 63.2945                | 35.11583               | 98    | <b>97</b>  | <b>TE</b>    | <b>0.55</b>     |
| <b>1b/2e</b> | IS-Aro | 2.58                 | 1.83                 | 57.90306               | 40.57281               | 98    |            |              |                 |
|              | IS-Ali | 0.85                 | 0.6                  | 59.68185               | 41.6186                | 101   | <b>100</b> | <b>TE</b>    | <b>0.70</b>     |
| <b>1c/2a</b> | IS-Aro |                      |                      |                        |                        | 0     |            |              |                 |
|              | IS-Ali |                      |                      |                        |                        | 0     | <b>0</b>   |              |                 |
| <b>1c/2b</b> | IS-Aro | 4.33                 |                      | 92.97052               |                        | 93    |            |              |                 |
|              | IS-Ali | 1.33                 |                      | 89.55781               |                        | 90    | <b>91</b>  | -            | -               |
| <b>1c/2d</b> | IS-Aro | 4.22                 |                      | 90.56878               |                        | 91    |            |              |                 |
|              | IS-Ali | 1.36                 |                      | 91.61812               |                        | 92    | <b>91</b>  | -            | -               |
| <b>1c/2e</b> | IS-Aro | 4.3                  |                      | 92.3155                |                        | 92    |            |              |                 |

| <b>THF Contd.</b> |        | ratio (remaining) | ratio (exchanged) | percent (remaining) | percent (exchanged) | total | avg       | towards | $K_{eq}$ |
|-------------------|--------|-------------------|-------------------|---------------------|---------------------|-------|-----------|---------|----------|
|                   | IS-Ali | 1.37              |                   | 92.30489            |                     | 92    | <b>92</b> | -       | -        |
| <b>1d/2a</b>      | IS-Aro | 4.35              |                   | 92.4864             |                     | 92    |           |         |          |
|                   |        |                   |                   |                     |                     |       |           |         |          |
|                   | IS-Ali | 1.37              |                   | 91.44119            |                     | 91    | <b>92</b> | -       | -        |
| <b>1d/2b</b>      | IS-Aro | 4.22              |                   | 89.7109             |                     | 90    |           |         |          |
|                   | IS-Ali | 1.32              |                   | 88.08834            |                     | 88    | <b>89</b> | -       | -        |
| <b>1d/2c</b>      | IS-Aro | 4.23              |                   | 89.9244             |                     | 90    |           |         |          |
|                   | IS-Ali | 1.34              |                   | 89.42948            |                     | 89    | <b>90</b> | -       | -        |
| <b>1d/2e</b>      | IS-Aro | 4.17              |                   | 88.6434             |                     | 89    |           |         |          |
|                   | IS-Ali | 1.31              |                   | 87.41777            |                     | 87    | <b>88</b> | -       | -        |
| <b>1e/2a</b>      | IS-Aro | 4.22              |                   | 90.6444             |                     | 91    |           |         |          |
|                   | IS-Ali | 1.34              |                   | 87.89372            |                     | 88    | <b>89</b> | -       | -        |
| <b>1e/2b</b>      | IS-Aro | 3.99              |                   | 85.64535            |                     | 86    |           |         |          |
|                   | IS-Ali | 1.33              |                   | 87.23124            |                     | 87    | <b>86</b> | -       | -        |
| <b>1e/2c</b>      | IS-Aro | 4.2               |                   | 90.2097             |                     | 90    |           |         |          |
|                   | IS-Ali | 1.39              |                   | 91.20612            |                     | 91    | <b>91</b> | -       | -        |
| <b>1e/2d</b>      | IS-Aro | 4.06              |                   | 87.1668             |                     | 87    |           |         |          |
|                   | IS-Ali | 1.33              |                   | 87.23124            |                     | 87    | <b>87</b> | -       | -        |

| <b>CDCl<sub>3</sub></b> |        | ratio<br>(remaining) | ratio<br>(exchanged) | percent<br>(remaining) | percent<br>(exchanged) | total | avg        | towards          | K <sub>eq</sub>   |
|-------------------------|--------|----------------------|----------------------|------------------------|------------------------|-------|------------|------------------|-------------------|
| <b>1a/2b</b>            | IS-Aro | 5.39                 |                      | 116.12213              |                        | 116   |            |                  |                   |
|                         | IS-Ali | 1.64                 |                      | 110.43112              |                        | 110   | <b>113</b> | -                | -                 |
| <b>1a/2c</b>            | IS-Aro | 4.9                  |                      | 105.52                 |                        | 106   |            |                  |                   |
|                         | IS-Ali | 1.57                 |                      | 105.68876              |                        | 106   | <b>106</b> | -                | -                 |
| <b>1a/2d</b>            | IS-Aro | 4.79                 | 0.18                 | 103.13993              | 3.39336                | 107   |            |                  |                   |
|                         | IS-Ali | 1.54                 | 0.06                 | 103.65632              | 3.38928                | 107   | <b>107</b> | TE (above<br>90) | <b>0.03</b>       |
| <b>1a/2e</b>            | IS-Aro | 4.71                 | 0.28                 | 101.40897              | 5.55706                | 107   |            |                  |                   |
|                         | IS-Ali | 1.51                 | 0.09                 | 101.62388              | 5.42172                | 107   | <b>107</b> | TE (above<br>90) | <b>0.05</b>       |
| <b>1b/2a</b>            | IS-Aro | 0.19                 | 4.36                 | 5.04986                | 91.42724               | 96    |            |                  |                   |
|                         | IS-Ali | 0.06                 | 1.39                 | 4.92216                | 91.55969               | 96    | <b>96</b>  | SH (above<br>90) | <b>18.6<br/>0</b> |
| <b>1b/2c</b>            | IS-Aro | 3.92                 | 0.58                 | 82.31308               | 13.12832               | 95    |            |                  |                   |
|                         | IS-Ali | 1.26                 | 0.19                 | 83.09136               | 13.39049               | 96    | <b>96</b>  | TE               | <b>0.16</b>       |
| <b>1b/2d</b>            | IS-Aro | 2.76                 | 1.65                 | 58.28484               | 35.2923                | 94    |            |                  |                   |
|                         | IS-Ali | 0.88                 | 0.52                 | 58.33778               | 34.88702               | 93    | <b>93</b>  | TE               | <b>0.60</b>       |
| <b>1b/2e</b>            | IS-Aro | 2.62                 | 1.89                 | 55.38488               | 40.26366               | 96    |            |                  |                   |
|                         | IS-Ali | 0.83                 | 0.6                  | 55.08073               | 40.0983                | 95    | <b>95</b>  | TE               | <b>0.73</b>       |
| <b>1c/2a</b>            | IS-Aro | 4.63                 |                      | 100.30201              |                        | 100   |            |                  |                   |
|                         | IS-Ali | 1.4                  |                      | 90.8267                |                        | 91    | <b>96</b>  | -                | -                 |
| <b>1c/2b</b>            | IS-Aro | 4.61                 |                      | 99.87427               |                        | 100   |            |                  |                   |
|                         | IS-Ali | 1.39                 |                      | 90.17451               |                        | 90    | <b>95</b>  | -                | -                 |
| <b>1c/2d</b>            | IS-Aro | 4.53                 |                      | 98.16331               |                        | 98    |            |                  |                   |
|                         | IS-Ali | 1.41                 |                      | 91.47889               |                        | 91    | <b>95</b>  | -                | -                 |
| <b>1c/2e</b>            | IS-Aro | 4.54                 |                      | 98.37718               |                        | 98    |            |                  |                   |
|                         | IS-Ali | 1.43                 |                      | 92.78327               |                        | 93    | <b>96</b>  | -                | -                 |
| <b>1d/2a</b>            | IS-Aro | 3.78                 |                      | 78.13028               |                        | 78    |            |                  |                   |
|                         | IS-Ali | 1.18                 |                      | 76.22874               |                        | 76    | <b>77</b>  | -                | -                 |
| <b>CDCl<sub>3</sub></b> |        | ratio                | ratio                | percent                | percent                | total | avg        | towards          | K <sub>eq</sub>   |

| <b>contd.</b> |        | (remaining) | (exchanged) | (remaining) | (exchanged) |    |           |   |   |
|---------------|--------|-------------|-------------|-------------|-------------|----|-----------|---|---|
| <b>1d/2b</b>  | IS-Aro | 4.68        |             | 96.82868    |             | 97 |           |   |   |
|               | IS-Ali | 1.39        |             | 89.86257    |             | 90 | <b>93</b> | - | - |
| <b>1d/2c</b>  | IS-Aro | 4.63        |             | 95.78988    |             | 96 |           |   |   |
|               | IS-Ali | 1.46        |             | 94.40718    |             | 94 | <b>95</b> | - | - |
| <b>1d/2e</b>  | IS-Aro | 4.64        |             | 95.99764    |             | 96 |           |   |   |
|               | IS-Ali | 1.46        |             | 94.40718    |             | 94 | <b>95</b> | - | - |
| <b>1e/2a</b>  | IS-Aro | 4.22        |             | 85.54272    |             | 86 |           |   |   |
|               | IS-Ali | 1.34        |             | 85.4176     |             | 85 | <b>85</b> | - | - |
| <b>1e/2b</b>  | IS-Aro | 4.58        |             | 92.75568    |             | 93 |           |   |   |
|               | IS-Ali | 1.39        |             | 88.57985    |             | 89 | <b>91</b> | - | - |
| <b>1e/2c</b>  | IS-Aro | 4.55        |             | 92.1546     |             | 92 |           |   |   |
|               | IS-Ali | 1.45        |             | 92.37455    |             | 92 | <b>92</b> | - | - |
| <b>1e/2d</b>  | IS-Aro | 4.45        |             | 90.151      |             | 90 |           |   |   |
|               | IS-Ali | 1.42        |             | 90.4772     |             | 90 | <b>90</b> | - | - |

| <b>MeCN</b>  |        | ratio<br>(remaining) | ratio<br>(exchanged) | percent<br>(remaining) | percent<br>(exchanged) | total | avg        | towards              | $K_{eq}$    |
|--------------|--------|----------------------|----------------------|------------------------|------------------------|-------|------------|----------------------|-------------|
| <b>1a/2b</b> | IS-Aro | insoluble            |                      |                        |                        |       |            |                      |             |
|              | IS-Ali |                      |                      |                        |                        |       |            |                      |             |
| <b>1a/2c</b> | IS-Aro | 3.9                  | 0.98                 | 76.0306                | 19.6454                | 96    |            |                      |             |
|              | IS-Ali | 1.14                 | 0.29                 | 72.0455                | 18.81                  | 91    | <b>93</b>  | <b>TE</b>            | <b>0.26</b> |
| <b>1a/2d</b> | IS-Aro | 1.45                 | 3.41                 | 28.7211                | 66.5687                | 95    |            |                      |             |
|              | IS-Ali | 0.4                  | 0.95                 | 25.6993                | 60.1458                | 86    | <b>91</b>  | <b>SH</b>            | <b>2.34</b> |
| <b>1a/2e</b> | IS-Aro | 0.94                 | 3.62                 | 18.873                 | 70.6238                | 89    |            |                      |             |
|              | IS-Ali | 0.36                 | 1.07                 | 23.1941                | 67.6614                | 91    | <b>90</b>  | <b>SH</b>            | <b>2.92</b> |
| <b>1b/2a</b> | IS-Aro | 0.94                 | 3.62                 | 19.50578               | 77.54654               | 97    |            |                      |             |
|              | IS-Ali | 0.3                  | 1.16                 | 20.1803                | 79.54352               | 100   | <b>98</b>  | <b>SH</b>            | <b>3.94</b> |
| <b>1b/2c</b> | IS-Aro | 1.48                 | 3.21                 | 31.20056               | 68.66717               | 100   |            |                      |             |
|              | IS-Ali | 0.47                 | 1.02                 | 31.91489               | 69.87974               | 102   | <b>101</b> | <b>SH</b>            | <b>2.19</b> |
| <b>1b/2d</b> | IS-Aro | 0.24                 | 4.42                 | 4.34588                | 94.87214               | 99    |            |                      |             |
|              | IS-Ali | 0.08                 | 1.41                 | 4.99436                | 96.80027               | 102   | <b>101</b> | <b>SH (above 90)</b> |             |
| <b>1b/2e</b> | IS-Aro | 0.7                  | 3.96                 | 14.3081                | 84.90992               | 99    |            |                      |             |
|              | IS-Ali | 0.22                 | 1.26                 | 14.65814               | 86.44622               | 101   | <b>100</b> | <b>SH</b>            | <b>5.90</b> |
| <b>1c/2a</b> | IS-Aro | 4.54                 |                      | 95.66382               |                        | 96    |            |                      |             |
|              | IS-Ali | 1.32                 |                      | 85.60918               |                        | 86    | <b>91</b>  | -                    | -           |
| <b>1c/2b</b> | IS-Aro | insoluble            |                      |                        |                        |       |            |                      |             |
|              | IS-Ali |                      |                      |                        |                        |       |            |                      |             |
| <b>1c/2d</b> | IS-Aro | 4.58                 |                      | 96.51894               |                        | 97    |            |                      |             |
|              | IS-Ali | 1.44                 |                      | 93.43546               |                        | 93    | <b>95</b>  | -                    | -           |
| <b>1c/2e</b> | IS-Aro | 4.43                 |                      | 93.31224               |                        | 93    |            |                      |             |
|              | IS-Ali | 1.4                  |                      | 90.8267                |                        | 91    | <b>92</b>  | -                    | -           |
| <b>1d/2a</b> | IS-Aro | 4.61                 | 0.33                 | 93.2807                | 9.3071                 | 103   |            |                      |             |
|              | IS-Ali | 1.32                 | 0.09                 | 84.66446               | 8.25317                | 93    | <b>98</b>  | <b>TE (above 90)</b> | <b>0.07</b> |
| <b>1d/2b</b> | IS-Aro | insoluble            |                      |                        |                        |       |            |                      |             |
| <b>MeCN</b>  |        | ratio                | ratio                | percent                | percent                | total | avg        | towards              | $K_{eq}$    |

| <b>Contd.</b> |        | (remaining) | (exchanged) | (remaining) | (exchanged) |    |           |                      |             |
|---------------|--------|-------------|-------------|-------------|-------------|----|-----------|----------------------|-------------|
|               | IS-Ali |             |             |             |             |    |           |                      |             |
| <b>1d/2c</b>  | IS-Aro | 4.7         |             | 95.0465     |             | 95 |           |                      |             |
|               | IS-Ali | 1.48        |             | 94.60414    |             | 95 | <b>95</b> | -                    | -           |
| <b>1d/2e</b>  | IS-Aro | 3.09        | 1.62        | 63.4583     | 34.6169     | 98 |           |                      |             |
|               | IS-Ali | 0.97        | 0.51        | 62.92141    | 34.34483    | 97 | <b>98</b> | <b>TE</b>            | <b>0.52</b> |
| <b>1e/2a</b>  | IS-Aro | 4.1         | 0.65        | 84.7786     | 13.1014     | 98 |           |                      |             |
|               | IS-Ali | 1.19        | 0.19        | 76.87797    | 11.95497    | 89 | <b>93</b> | <b>TE</b>            | <b>0.16</b> |
| <b>1e/2b</b>  | IS-Aro | insoluble   |             |             |             |    |           |                      |             |
|               | IS-Ali |             |             |             |             |    |           |                      |             |
| <b>1e/2c</b>  | IS-Aro | 4.2         | 0.36        | 86.8562     | 7.07636     | 94 |           |                      |             |
|               | IS-Ali | 1.32        | 0.11        | 85.31796    | 6.76113     | 92 | <b>93</b> | <b>TE (above 90)</b> | <b>0.09</b> |
| <b>1e/2d</b>  | IS-Aro | 2.82        | 1.72        | 58.18532    | 35.33172    | 94 |           |                      |             |
|               | IS-Ali | 0.88        | 0.54        | 56.75184    | 34.67802    | 91 | <b>92</b> | <b>TE</b>            | <b>0.61</b> |

| <b>DMSO</b>  |        | ratio<br>(remaining) | ratio<br>(exchanged) | percent<br>(remaining) | percent<br>(exchanged) | <b>total</b> | <b>avg</b> | <b>towards</b> | <b>K<sub>eq</sub></b> |
|--------------|--------|----------------------|----------------------|------------------------|------------------------|--------------|------------|----------------|-----------------------|
| <b>1a/2b</b> | IS-Aro | 4.35                 |                      | 90.79785               |                        | 91           |            |                |                       |
|              | IS-Ali | 1.41                 |                      | 90.12578               |                        | 90           | <b>90</b>  | -              | -                     |
| <b>1a/2c</b> | IS-Aro | 1.1                  | 3.17                 | 22.8696                | 66.13467               | 89           |            |                |                       |
|              | IS-Ali | 0.36                 | 1.04                 | 22.82288               | 66.40952               | 89           | <b>89</b>  | <b>SH</b>      | <b>2.91</b>           |
| <b>1a/2d</b> | IS-Aro | 0.93                 | 3.34                 | 19.31643               | 69.68784               | 89           |            |                |                       |
|              | IS-Ali | 0.3                  | 1.09                 | 18.977                 | 69.61442               | 89           | <b>89</b>  | <b>SH</b>      | <b>3.67</b>           |
| <b>1a/2e</b> | IS-Aro | 0.83                 | 3.56                 | 17.22633               | 74.28606               | 92           |            |                |                       |
|              | IS-Ali | 0.27                 | 1.16                 | 17.05406               | 74.10128               | 91           | <b>91</b>  | <b>SH</b>      | <b>4.35</b>           |
| <b>1b/2a</b> | IS-Aro | 1.51                 | 2.51                 | 34.85398               | 57.87198               | 93           |            |                |                       |
|              | IS-Ali | 0.49                 | 0.82                 | 34.37181               | 57.60348               | 92           | <b>92</b>  | <b>SH</b>      | <b>1.68</b>           |
| <b>1b/2c</b> | IS-Aro | 0.07                 | 4.07                 | 1.70806                | 93.78006               | 95           |            |                |                       |
|              | IS-Ali | 0.02                 | 1.32                 | 1.28428                | 92.80298               | 94           | <b>95</b>  | <b>SH</b>      | <b>72.26</b>          |
| <b>1b/2d</b> | IS-Aro | 0.31                 | 3.78                 | 7.23238                | 87.10484               | 94           |            |                |                       |
|              | IS-Ali | 0.1                  | 1.24                 | 6.9162                 | 87.17106               | 94           | <b>94</b>  | <b>SH</b>      | <b>12.60</b>          |
| <b>1b/2e</b> | IS-Aro | 0.36                 | 3.75                 | 8.38328                | 86.4143                | 95           |            |                |                       |
|              | IS-Ali | 0.12                 | 1.23                 | 8.32418                | 86.46707               | 95           | <b>95</b>  | <b>SH</b>      | <b>10.39</b>          |
| <b>1c/2a</b> | IS-Aro | 4.25                 |                      | 89.4366                |                        | 89           |            |                |                       |
|              | IS-Ali | 1.39                 |                      | 89.16937               |                        | 89           | <b>89</b>  | -              | -                     |
| <b>1c/2b</b> | IS-Aro | 4.28                 |                      | 90.06996               |                        | 90           |            |                |                       |
|              | IS-Ali | 1.38                 |                      | 88.52514               |                        | 89           | <b>89</b>  | -              | -                     |
| <b>1c/2d</b> | IS-Aro | 2.51                 | 1.66                 | 52.70172               | 34.75652               | 87           |            |                |                       |
|              | IS-Ali | 0.81                 | 0.54                 | 51.80403               | 34.40982               | 86           | <b>87</b>  | <b>TE</b>      | <b>0.66</b>           |
| <b>1c/2e</b> | IS-Aro | 2.72                 | 1.9                  | 57.13524               | 39.8234                | 97           |            |                |                       |
|              | IS-Ali | 0.88                 | 0.61                 | 56.31364               | 38.91943               | 95           | <b>96</b>  | <b>TE</b>      | <b>0.69</b>           |
| <b>1d/2a</b> | IS-Aro | 3.71                 | 0.42                 | 81.10416               | 8.83602                | 90           |            |                |                       |
|              | IS-Ali | 1.21                 | 0.14                 | 80.84793               | 8.78022                | 90           | <b>90</b>  | <b>SH</b>      | <b>0.11</b>           |
| <b>DMSO</b>  |        | ratio                | ratio                | percent                | percent                | <b>total</b> | <b>avg</b> | <b>towards</b> | <b>K<sub>eq</sub></b> |



| <b>Contd.</b> |        | (remaining) | (exchanged) | (remaining) | (exchanged) |     |            |              |             |
|---------------|--------|-------------|-------------|-------------|-------------|-----|------------|--------------|-------------|
| <b>1d/2b</b>  | IS-Aro | 4.21        |             | 92.08716    |             | 92  |            |              |             |
|               | IS-Ali | 1.37        |             | 91.62441    |             | 92  | <b>92</b>  | -            | -           |
| <b>1d/2c</b>  | IS-Aro | 2.27        | 1.93        | 49.47312    | 42.00468    | 91  |            |              |             |
|               | IS-Ali | 0.62        | 0.73        | 41.10966    | 48.51849    | 90  | <b>91</b>  | <b>equal</b> | <b>1.18</b> |
| <b>1d/2e</b>  | IS-Aro | 2.19        | 2.16        | 47.71584    | 47.05686    | 95  |            |              |             |
|               | IS-Ali | 0.71        | 0.7         | 47.17143    | 46.4979     | 94  | <b>94</b>  | <b>equal</b> | <b>0.99</b> |
| <b>1e/2a</b>  | IS-Aro | 3.73        | 0.52        | 83.02688    | 11.58512    | 95  |            |              |             |
|               | IS-Ali | 1.21        | 0.17        | 83.00301    | 11.79317    | 95  | <b>95</b>  | <b>TE</b>    | <b>0.14</b> |
| <b>1e/2b</b>  | IS-Aro | 4.23        |             | 94.15488    |             | 94  |            |              |             |
|               | IS-Ali | 1.38        |             | 94.64308    |             | 95  | <b>94</b>  | -            | -           |
| <b>1e/2c</b>  | IS-Aro | 2.14        | 2.61        | 47.63984    | 58.10016    | 106 |            |              |             |
|               | IS-Ali | 0.69        | 0.85        | 47.39809    | 58.35345    | 106 | <b>106</b> | <b>equal</b> | <b>1.23</b> |
| <b>1e/2d</b>  | IS-Aro | 2.1         | 1.72        | 46.7496     | 38.29232    | 85  |            |              |             |
|               | IS-Ali | 0.68        | 0.56        | 46.71338    | 38.49686    | 85  | <b>85</b>  | <b>TE</b>    | <b>0.82</b> |

| MeOH         |        | ratio<br>(remaining) | ratio<br>(exchanged) | ratio<br>(hydrolyzed) | percent<br>(remaining) | percent<br>(exchanged) | percent<br>(hydrolyzed) | total        | avg        | twrds                | K <sub>eq</sub>       |
|--------------|--------|----------------------|----------------------|-----------------------|------------------------|------------------------|-------------------------|--------------|------------|----------------------|-----------------------|
| <b>1a/2b</b> | IS-Aro | 3.66                 |                      | 0.54                  | 72.25                  |                        | 14.38                   | 87           |            |                      |                       |
|              | IS-Ali | 1.04                 |                      | 0.15                  | 64.04                  |                        | 12.90                   | 77           | <b>82</b>  | -                    | -                     |
| <b>1a/2c</b> | IS-Aro | 1.73                 | 2.8                  | 0.04                  | 34.13                  | 55.26                  | 4.63                    | 94           |            |                      |                       |
|              | IS-Ali | 0.53                 | 0.87                 | 0.01                  | 32.64                  | 53.57                  | 4.41                    | 91           | <b>92</b>  | SH                   | <b>1.64</b>           |
| <b>1a/2d</b> | IS-Aro | 0.72                 | 4.06                 | 0.02                  | 14.19                  | 80.14                  | 4.24                    | 99           |            |                      |                       |
|              | IS-Ali | 0.22                 | 1.24                 | 0                     | 13.55                  | 76.35                  | 3.81                    | 94           | <b>96</b>  | SH                   | <b>5.64</b>           |
| <b>1a/2e</b> | IS-Aro | 0.95                 | 3.75                 | 0.02                  | 18.73                  | 74.02                  | 4.24                    | 97           |            |                      |                       |
|              | IS-Ali | 0.29                 | 1.14                 | 0.01                  | 17.86                  | 70.20                  | 4.41                    | 92           | <b>95</b>  | SH                   | <b>3.93</b>           |
| <b>1b/2a</b> | IS-Aro | n/d                  | 2.93                 | 1.17                  |                        | 79.99                  | 26.65                   | 107          |            |                      |                       |
|              | IS-Ali | n/d                  | 0.91                 | 0.37                  |                        | 76.26                  | 26.24                   | 103          | <b>105</b> | SH                   | n/d                   |
| <b>1b/2c</b> | IS-Aro | n/d                  | 3.69                 | 0.95                  |                        | 100.16                 | 22.37                   | 123          |            |                      |                       |
|              | IS-Ali | n/d                  | 1.15                 | 0.3                   |                        | 95.72                  | 21.99                   | 118          | <b>120</b> | SH                   | n/d                   |
| <b>1b/2d</b> | IS-Aro | n/d                  | 3.84                 | 0.87                  |                        | 104.14                 | 20.81                   | 125          |            |                      |                       |
|              | IS-Ali | n/d                  | 1.18                 | 0.27                  |                        | 98.15                  | 20.18                   | 118          | <b>122</b> | SH                   | n/d                   |
| <b>1b/2e</b> | IS-Aro | n/d                  | 3.58                 | 0.98                  |                        | 97.24                  | 22.95                   | 120          |            |                      |                       |
|              | IS-Ali | n/d                  | 1.15                 | 0.31                  |                        | 95.72                  | 22.60                   | 118          | <b>119</b> | SH                   | n/d                   |
| <b>1c/2a</b> | IS-Aro | 4.14                 | 0.09                 |                       | 89.00                  | 4.62                   |                         | 94           |            |                      |                       |
|              | IS-Ali | 1.24                 | 0.03                 |                       | 83.00                  | 4.93                   |                         | 88           | <b>91</b>  | TE<br>(above<br>90%) | -                     |
| <b>1c/2b</b> | IS-Aro | 4.21                 |                      | 0.09                  | 90.53                  |                        | 5.61                    | 96           |            |                      |                       |
|              | IS-Ali | 1.26                 |                      | 0.03                  | 84.35                  |                        | 5.63                    | 90           | <b>93</b>  | TE<br>(above<br>90%) | -                     |
| <b>1c/2d</b> | IS-Aro | 2.39                 | 1.7                  | 0.26                  | 50.83                  | 35.78                  | 8.92                    | 96           |            |                      |                       |
|              | IS-Ali | 0.76                 | 0.54                 | 0.08                  | 50.41                  | 35.47                  | 8.66                    | 95           | <b>95</b>  | TE                   | <b>0.70</b>           |
| <b>1c/2e</b> | IS-Aro | 2.51                 | 1.64                 | 0.26                  | 53.45                  | 34.47                  | 8.92                    | 97           |            |                      |                       |
| <b>MeOH</b>  |        | ratio                | ratio                | ratio                 | percent                | percent                | percent                 | <b>total</b> | <b>avg</b> | <b>twrds</b>         | <b>K<sub>eq</sub></b> |

| <b>contd.</b> |        | (remaining) | (exchanged) | (hydrolyzed) | (remaining) | (exchanged) | (hydrolyzed) |    |           |                               |             |
|---------------|--------|-------------|-------------|--------------|-------------|-------------|--------------|----|-----------|-------------------------------|-------------|
|               | IS-Ali | 0.79        | 0.51        | 0.08         | 52.44       | 33.43       | 8.66         | 95 | <b>96</b> | <b>TE</b>                     | <b>0.64</b> |
| <b>1d/2a</b>  | IS-Aro | 4           | 0.45        |              | 80.54       | 5.85        |              | 86 |           |                               |             |
|               | IS-Ali | 1.17        | 0.13        |              | 75.16       | 3.80        |              | 79 | <b>83</b> | <b>TE<br/>(above<br/>90%)</b> | <b>-</b>    |
| <b>1d/2b</b>  | IS-Aro | 3.9         |             | 0.23         | 79.07       | -6.92       | 8.33         | 80 |           |                               |             |
|               | IS-Ali | 1.22        |             | 0.07         | 77.59       | -7.90       | 8.05         | 78 | <b>79</b> | <b>-</b>                      | <b>-</b>    |
| <b>1d/2c</b>  | IS-Aro | 1.64        | 2.22        | 0.29         | 36.03       | 48.86       | 9.50         | 94 |           |                               |             |
|               | IS-Ali | 0.51        | 0.69        | 0.09         | 34.47       | 47.14       | 9.26         | 91 | <b>93</b> | <b>SH</b>                     | <b>1.37</b> |
| <b>1d/2e</b>  | IS-Aro | 2.18        | 1.69        | 0.38         | 48.02       | 37.19       | 11.26        | 96 |           |                               |             |
|               | IS-Ali | 0.63        | 0.49        | 0.11         | 43.05       | 32.98       | 10.48        | 87 | <b>91</b> | <b>TE</b>                     | <b>0.77</b> |
| <b>1e/2a</b>  | IS-Aro | 3.76        | 0.53        |              | 80.79       | 10.85       |              | 92 |           |                               |             |
|               | IS-Ali | 1.18        | 0.17        |              | 78.09       | 11.49       |              | 90 | <b>91</b> | <b>TE</b>                     | <b>0.15</b> |
| <b>1e/2b</b>  | IS-Aro | 4.07        | 0.29        |              | 87.50       | 5.66        |              | 93 |           |                               |             |
|               | IS-Ali | 1.25        | 0.09        |              | 82.71       | 6.21        |              | 89 | <b>91</b> | <b>TE</b>                     | <b>0.08</b> |
| <b>1e/2c</b>  | IS-Aro | 1.62        | 2.4         | 0.25         | 34.45       | 51.34       | 8.72         | 95 |           |                               |             |
|               | IS-Ali | 0.51        | 0.76        | 0.08         | 33.91       | 50.40       | 8.66         | 93 | <b>94</b> | <b>SH</b>                     | <b>1.49</b> |
| <b>1e/2d</b>  | IS-Aro | 1.93        | 2.01        | 0.3          | 41.17       | 42.90       | 9.70         | 94 |           |                               |             |
|               | IS-Ali | 0.61        | 0.63        | 0.09         | 40.50       | 41.82       | 9.26         | 92 | <b>93</b> | <b>equal</b>                  | <b>1.03</b> |

Below is the raw and processed data which generated **Table 1** of the manuscript:

| <b>w/<br/>pyridine</b>  |        | ratio<br>(remaining) | ratio<br>(exchanged) | percent<br>(remaining) | percent<br>(exchanged) | total | avg        | towards | $K_{eq}$ |
|-------------------------|--------|----------------------|----------------------|------------------------|------------------------|-------|------------|---------|----------|
| <b>CDCl<sub>3</sub></b> |        |                      |                      |                        |                        |       |            |         |          |
| <b>1a/2c</b>            | IS-Aro | 4.75                 |                      | 102.27445              |                        | 102   |            |         |          |
|                         | IS-Ali | 1.51                 |                      | 101.62388              |                        | 102   | <b>102</b> | -       | -        |
| <b>THF</b>              |        |                      |                      |                        |                        |       |            |         |          |
| <b>1a/2c</b>            | IS-Aro | 4.73                 |                      | 97.14744               |                        | 97    |            |         |          |
|                         | IS-Ali | 1.49                 |                      | 96.34                  |                        | 96    | <b>97</b>  | -       | -        |
| <b>MeCN</b>             |        |                      |                      |                        |                        |       |            |         |          |
| <b>1a/2c</b>            | IS-Aro | 4.94                 |                      | 96.113                 |                        | 96    |            |         |          |
|                         | IS-Ali | 1.53                 |                      | 96.4712                |                        | 96    | <b>96</b>  | -       | -        |

| <b>w/ DBU</b>           |        | ratio<br>(remaining) | ratio<br>(exchanged) | percent<br>(remaining) | percent<br>(exchanged) | total | avg       | towards   | $K_{eq}$    |
|-------------------------|--------|----------------------|----------------------|------------------------|------------------------|-------|-----------|-----------|-------------|
| <b>CDCl<sub>3</sub></b> |        |                      |                      |                        |                        |       |           |           |             |
| <b>1a/2c</b>            | IS-Aro | 1.74                 | 1.9                  | 37.14708               | 39.0714                | 76    |           |           |             |
|                         | IS-Ali | 0.85                 | 0.59                 | 56.9102                | 37.92417               | 95    | <b>86</b> | <b>TE</b> | <b>0.67</b> |
| <b>THF</b>              |        |                      |                      |                        |                        |       |           |           |             |
| <b>1a/2c</b>            | IS-Aro | 1.06                 | 3.66                 | 22.17668               | 77.7549                | 100   |           |           |             |
|                         | IS-Ali | 0.31                 | 1.07                 | 20.1828                | 71.32409               | 92    | <b>96</b> | <b>SH</b> | <b>3.53</b> |
| <b>MeCN</b>             |        |                      |                      |                        |                        |       |           |           |             |
| <b>1a/2c</b>            | IS-Aro | 1.58                 | 3.31                 | 31.2314                | 67.7672                | 99    |           |           |             |
|                         | IS-Ali | 0.47                 | 0.98                 | 30.0834                | 63.54264               | 94    | <b>96</b> | <b>SH</b> | <b>2.11</b> |

| w/ BEMP                 |        | ratio<br>(remaining) | ratio<br>(exchanged) | percent<br>(remaining) | percent<br>(exchanged) | total | avg       | towards   | K <sub>eq</sub> |
|-------------------------|--------|----------------------|----------------------|------------------------|------------------------|-------|-----------|-----------|-----------------|
| <b>CDCI<sub>3</sub></b> |        |                      |                      |                        |                        |       |           |           |                 |
| <b>1a/2c</b>            | IS-Aro | 3.27                 | 1.53                 | 70.25169               | 31.38428               | 102   |           |           |                 |
|                         | IS-Ali | 0.98                 | 0.46                 | 65.71744               | 29.48418               | 95    | <b>98</b> | <b>TE</b> | <b>0.45</b>     |
| <b>THF</b>              |        |                      |                      |                        |                        |       |           |           |                 |
| <b>1a/2c</b>            | IS-Aro | 1.32                 | 3.42                 | 27.48796               | 72.6309                | 100   |           |           |                 |
|                         | IS-Ali | 0.39                 | 1                    | 25.346                 | 66.6301                | 92    | <b>96</b> | <b>SH</b> | <b>2.63</b>     |
| <b>MeCN</b>             |        |                      |                      |                        |                        |       |           |           |                 |
| <b>1a/2c</b>            | IS-Aro | 1.36                 | 3.63                 | 26.9832                | 74.0456                | 101   |           |           |                 |
|                         | IS-Ali | 0.4                  | 1.08                 | 25.6993                | 69.75494               | 95    | <b>98</b> | <b>SH</b> | <b>2.71</b>     |

Below is the raw and processed data that generated **Table 3** of the manuscript:

| w/<br>DMAP              |        | ratio<br>(remaining) | ratio<br>(exchanged) | percent<br>(remaining) | percent<br>(exchanged) | total | avg        | towards   | K <sub>eq</sub> |
|-------------------------|--------|----------------------|----------------------|------------------------|------------------------|-------|------------|-----------|-----------------|
| <b>CDCI<sub>3</sub></b> |        |                      |                      |                        |                        |       |            |           |                 |
| <b>1a/2c</b>            | IS-Aro | 4.79                 | 0.01                 | 103.13993              | -0.19524               | 103   |            |           |                 |
|                         | IS-Ali | 1.53                 | 0                    | 102.97884              | -0.3804                | 103   | <b>103</b> | <b>TE</b> | <b>0.00</b>     |
| <b>THF</b>              |        |                      |                      |                        |                        |       |            |           |                 |
| <b>1a/2c</b>            | IS-Aro | 5.07                 | 0.01                 | 104.09296              | -0.1726                | 104   |            |           |                 |
|                         | IS-Ali | 1.63                 | 0                    | 105.3756               | -0.4269                | 105   | <b>104</b> | <b>TE</b> | <b>0.00</b>     |
| <b>MeCN</b>             |        |                      |                      |                        |                        |       |            |           |                 |
| <b>1a/2c</b>            | IS-Aro | 4.4                  | 0.37                 | 85.6856                | 10.0844                | 96    |            |           |                 |
|                         | IS-Ali | 1.31                 | 0.11                 | 82.6926                | 9.49563                | 92    | <b>94</b>  | <b>TE</b> | <b>0.11</b>     |
| <b>DMSO</b>             |        |                      |                      |                        |                        |       |            |           |                 |
| <b>1a/2c</b>            | IS-Aro | 1.74                 | 2.64                 | 36.24624               | 55.44628               | 92    |            |           |                 |
|                         | IS-Ali | 0.56                 | 0.85                 | 35.64248               | 54.38095               | 90    | <b>91</b>  | <b>TE</b> | <b>1.53</b>     |

| <b>w/<br/>DABCO</b>     |        | <b>ratio<br/>(remaining)</b> | <b>ratio<br/>(exchanged)</b> | <b>percent<br/>(remaining)</b> | <b>percent<br/>(exchanged)</b> | <b>total</b> | <b>avg</b> | <b>towards</b> | <b>K<sub>eq</sub></b> |
|-------------------------|--------|------------------------------|------------------------------|--------------------------------|--------------------------------|--------------|------------|----------------|-----------------------|
| <b>CDCl<sub>3</sub></b> |        |                              |                              |                                |                                |              |            |                |                       |
| <b>1a/2c</b>            | IS-Aro | 4.81                         | 0.04                         | 103.57267                      | 0.42804                        | 104          |            |                |                       |
|                         | IS-Ali | 1.53                         | 0.01                         | 102.97884                      | 0.26883                        | 103          | <b>104</b> | <b>TE</b>      | <b>0.00</b>           |
| <b>THF</b>              |        |                              |                              |                                |                                |              |            |                |                       |
| <b>1a/2c</b>            | IS-Aro | 5.26                         | 0.06                         | 107.97428                      | 0.8949                         | 109          |            |                |                       |
|                         | IS-Ali | 1.53                         | 0.02                         | 98.9216                        | 0.91424                        | 100          | <b>104</b> | <b>TE</b>      | <b>0.01</b>           |
| <b>MeCN</b>             |        |                              |                              |                                |                                |              |            |                |                       |
| <b>1a/2c</b>            | IS-Aro | 3.77                         | 0.98                         | 73.5203                        | 22.0526                        | 96           |            |                |                       |
|                         | IS-Ali | 1.08                         | 0.28                         | 68.2877                        | 20.05654                       | 88           | <b>92</b>  | <b>TE</b>      | <b>0.29</b>           |
| <b>DMSO</b>             |        |                              |                              |                                |                                |              |            |                |                       |
| <b>1a/2c</b>            | IS-Aro | 1.17                         | 3.2                          | 24.33267                       | 67.269                         | 92           |            |                |                       |
|                         | IS-Ali | 0.36                         | 1                            | 22.82288                       | 64.0444                        | 87           | <b>89</b>  | <b>SH</b>      | <b>2.81</b>           |

| <b>w/ quin.</b>         |        | <b>ratio<br/>(remaining)</b> | <b>ratio<br/>(exchanged)</b> | <b>percent<br/>(remaining)</b> | <b>percent<br/>(exchanged)</b> | <b>total</b> | <b>avg</b> | <b>towards</b> | <b>K<sub>eq</sub></b> |
|-------------------------|--------|------------------------------|------------------------------|--------------------------------|--------------------------------|--------------|------------|----------------|-----------------------|
| <b>CDCl<sub>3</sub></b> |        |                              |                              |                                |                                |              |            |                |                       |
| <b>1a/2c</b>            | IS-Aro | 4.55                         | 0.35                         | 97.94705                       | 6.8686                         | 105          |            |                |                       |
|                         | IS-Ali | 1.43                         | 0.11                         | 96.20404                       | 6.76113                        | 103          | <b>104</b> | <b>TE</b>      | <b>0.07</b>           |
| <b>THF</b>              |        |                              |                              |                                |                                |              |            |                |                       |
| <b>1a/2c</b>            | IS-Aro | 4.93                         | 0.27                         | 101.23304                      | 5.3784                         | 107          |            |                |                       |
|                         | IS-Ali | 1.55                         | 0.08                         | 100.2124                       | 4.93766                        | 105          | <b>106</b> | <b>TE</b>      | <b>0.05</b>           |
| <b>MeCN</b>             |        |                              |                              |                                |                                |              |            |                |                       |
| <b>1a/2c</b>            | IS-Aro | 2.51                         | 2.46                         | 49.1897                        | 51.0902                        | 100          |            |                |                       |
|                         | IS-Ali | 0.71                         | 0.69                         | 45.1146                        | 45.52697                       | 91           | <b>95</b>  | <b>TE/SH</b>   | <b>1.01</b>           |
| <b>DMSO</b>             |        |                              |                              |                                |                                |              |            |                |                       |
| <b>1a/2c</b>            | IS-Aro | 1.03                         | 3.29                         | 21.40653                       | 69.16908                       | 91           |            |                |                       |
|                         | IS-Ali | 0.33                         | 1.06                         | 20.89994                       | 67.90978                       | 89           | <b>90</b>  | <b>SH</b>      | <b>3.25</b>           |
